# Supplementary material
Source: PubMed Central journal article supplement (PMC3429338)
Supplement: NIHMS397813-supplement-1.pdf [file NIHMS397813-supplement-1.pdf]

## **Supplemental Material**

Online Methods (pp. 2-5)

Online Tables I – XIV (pp. 6-35)

Online Figures I – VI (pp. 36-44)

References (p. 45)

Appendix on RNA-sequencing; laboratory and analytic protocols (pp. 46-65)

## Online Methods

**miR and mRNA expression analysis in human heart failure.** The cohort of nonfailing and failing human heart samples (all Caucasian) used for these analyses has been previously described<sup>1</sup>. Two of the 11 heart samples originally described as nonfailing had cardiac masses greater than 500 g and exhibited an altered miR signature, as previously discussed<sup>1</sup>; these samples have been renamed ‘hypertrophied, non-failing’ in this manuscript. A further two samples clustered with failing samples rather than other nonfailing samples; these were excluded from the present data analyses. miR and mRNA expression data were calculated on the 5 remaining nonfailing (3 male, 2 female) and 13 failing (6 male, 7 female) human heart samples from which both miR and mRNA expression data were obtained (mRNA data were not available for the two ‘hypertrophied, non-failing’ hearts). Invitrogen NCode miR microarrays were used for determination of miR expression levels, while Affymetrix HuEx 1.0 exon microarrays were used to determine mRNA expression levels. Partek Genomics Suite (St. Louis, MO) software was used for array signal normalization and comparative analysis, as previously described<sup>1</sup>.

**miR and mRNA expression analysis in Gαq transgenic mice.** miR microarray analysis was performed on four male nontransgenic and four male Gαq transgenic mouse hearts at LC Sciences (Houston, TX) as previously described<sup>2</sup>. TaqMan microRNA assays (Applied Biosystems) for miR-499 and U6, and NCode microRNA RT-qPCR for 5S rRNA, were performed on a separate cohort of ntg and Gαq mice. RNA-sequencing for mRNA expression analysis was performed as previously described<sup>3</sup>.

**Whole-genome transcription profiling by RNA sequencing.** Preparation of cDNA fragments from RNA was as previously described<sup>4</sup>. For poly(A)+ RNA, 4 μg of total RNA was twice oligo(dT) selected using the Dynabead mRNA purification system (Invitrogen). Two hundred ng of mRNA was fragmented to ~200 nt by heating to 94 C for 2.5 min in 40 mmol/L Tris acetate pH 8.2, 100 mmol/L potassium acetate, 30 mmol/L magnesium acetate, and immediately chilled on ice. After purification on Ambion NucAway columns, 100 ng of fragmented mRNA was reverse-transcribed using SuperScript III (Invitrogen) with random hexamers as per the manufacturer’s directions (50 min, 50 C), followed by second-strand cDNA synthesis for 2 h, 16 C, in 20 mmol/L Tris.HCl pH 6.9, 90 mmol/L KCl, 4.6 mmol/L MgCl<sub>2</sub>, 150 mmol/L β-NAD<sup>+</sup>, 10 mmol/L (NH<sub>4</sub>)<sub>2</sub>SO<sub>4</sub>, 0.067 U/μL *E. coli* DNA ligase, 0.27 U/μL *E. coli* DNA polymerase I, and 0.013 U/mL *E. coli* RNase H (New England Biolabs).

**RT-qPCR for RNA sequencing validation.** SuperScript III (Invitrogen) with oligo-dT(20) primers was used to reverse-transcribe cDNA from 1 μg of total RNA. qPCR on 1/20<sup>th</sup> of the reverse-transcription product was performed in triplicate with TaqMan FAM-labeled probes and primer sets (Applied Biosystems) and Perfecta PCR supermix (Quanta Biosciences). The following TaqMan assays were used: *Actb*, Mm01205647\_g1; *Gapdh*, Mm99999915\_g1; *Hmbs*, Mm00660262\_g1; *Irs2*, Mm03038438\_m1; *Rcn2*, Mm00488777\_m1; *Sos2*, Mm01265231\_m1; *Tmbim6*, Mm00509864\_m1.

**In vivo miR target analysis by RISC sequencing.** Conditions for Ago2 immunoprecipitation were adapted from Karginov *et al.*<sup>5</sup>, as described in<sup>4</sup>. Frozen mouse heart bases were homogenized in 500 μL ice-cold 50 mmol/L Tris.HCl, 5 mmol/L EDTA, 5 mmol/L EGTA, pH 7.5, with Roche Complete protease inhibitors. Yeast tRNA (Invitrogen) and SUPERnase-IN (Ambion) were added to final concentrations of 1 μg/μL and 1 U/μL, respectively, and unbroken cellular material was removed at 100g, 5’, 4 C. Nonidet P-40 was added to a final concentration of 0.5% (w/v) to solubilize proteins (15’, 4 C, rotating) and insoluble material was removed at 10000g, 15’, 4 C. The supernatant was added to 50 μL protein G-coupled Dynabeads (Invitrogen), to which 5 μg anti-Ago2 monoclonal antibody (Wako Pure, clone #2D4, lot PEM0820) had been previously bound according to the Dynabead protocol. Following 1 h rotational incubation at 4 C, the beads were washed 3x with Dynabead washing buffer, transferring the suspension to a fresh tube for the last wash. Beads were pelleted from the remaining suspension, the supernatant was

removed, and 500  $\mu$ L Trizol was added to the immunoprecipitated material to extract RNA. Ago2 immunoprecipitate-associated RNA was fragmented in acetate buffer without poly-A+ selection, purified on NucAway columns, and one half was used for cDNA synthesis using the protocol described above.

**Construction of DNA-barcoded short-read RNA libraries for Illumina sequencing.** Detailed methods for preparation of Illumina sequencing libraries from mouse cardiac cDNAs were recently described<sup>3</sup>. Briefly, cDNAs were end-repaired and 3' A-overhangs added. Illumina adapters with T-overhangs and customized to include three nt 'barcodes' were ligated to the cDNA at 10:1 molar excess and DNA in the 200-400 bp range was isolated via gel purification (Qiagen) on 2% low-melting agarose. One-third of the gel-purified material was amplified with 12 cycles (total myocardial cDNA) or 16 cycles (RISC-immunoprecipitated cDNA) of Phusion polymerase (New England Biolabs #F531)-mediated PCR (10 sec 98 C, 30 sec 65 C, 30 sec 72 C cycles, followed by final 5 min 72 C), using oligonucleotides complementary to Illumina sequencing adapters. The final, amplified libraries were again column-purified and quantified using PicoGreen (Quant-It, Invitrogen).

Eight barcoded libraries were combined in equimolar (10 nmol/L) amounts and diluted to 8 pmol/L for cluster formation on an Illumina HiSeq flowcell lane, followed by single-end sequencing. Library sorting by barcode and mapping to the transcriptome were performed as previously described<sup>3</sup>, using the software packages TopHat<sup>6</sup> (version 1.1) and Cufflinks<sup>7</sup> (version 0.9.3). Cufflinks outputs gene expression values in terms of Fragments Per Kb of exon per Million mapped reads (FPKM)<sup>7</sup>. When performing single-end Illumina sequencing, as we have done here, this parameter is equivalent to RPKM (Reads Per Kb of exon per Million mapped reads), in which we have estimated that an RPKM of 3 corresponds to 1 copy/cell in cardiac samples<sup>3,8</sup>. We used the default options supplied with these software packages in our analyses and analyzed only those RNA elements that had expression signals in at least 50% of biological replicates.

**Analysis of RNA sequencing data.** Transcriptome sequencing libraries averaged  $6.6 \times 10^6$  reads per sample, with 84% alignment to the mouse genome. RISCome sequencing libraries averaged  $4.8 \times 10^6$  reads per sample, with 58% alignment to the mouse genome. Because they are not poly-A+ selected, RISCome sequencing libraries contained a higher proportion of ribosomal RNA (32-42%) than poly-A+ selected transcriptome libraries (3-5%). To permit comparison between the transcriptome and RISCome, measures of RNA abundance expressed as FPKM<sup>7</sup> were scaled according to the proportion of mRNA in each sample. Gene symbols and FPKM values were imported into Partek Genomics Suite v6.5 (Partek, St Louis, MO) for comparison of RISCome and transcriptome expression values, computation of P-values, unsupervised hierarchical clustering with Euclidean distance, and heatmap plotting. Gene Ontology classification was performed using the BiNGO plugin to Cytoscape<sup>9</sup>, together with over-representation hypergeometric tests with Benjamini & Hochberg false discovery rate correction.

**Analysis of RISC sequencing data.** For each mRNA in each individual heart, its content in Ago2 immunoprecipitates was compared to that in the transcriptome (poly-A+ RNA) to derive a RISC score. The mean and standard error of the RISC score was calculated for each group of hearts (nontransgenic, n=7; miR-499 TG-16, n=6; and miR-499 TG-53, n=8). A RISC-enriched mRNA was defined as any mRNA with a RISC score  $\geq 2$ ; 63 mRNAs were found to have RISC scores in miR-499 hearts that were  $\geq 1.25$ -fold those in nontransgenic hearts,  $P < 0.05$ , and were defined as miR-499 RISC-enriched mRNAs. An additional 4 mRNAs were included, and defined as 'newly-enriched'. These had  $\geq 3$ -fold enrichment in Ago2-IP RNA (RISCome RNA) in transgenic compared to nontransgenic hearts, without a similar increase in transcriptome RNA, but did not meet the initial criteria. Downregulated mRNAs in the corresponding transcriptomes were defined as at least 1.1-fold downregulated compared to nontransgenic hearts, at  $P < 0.025$ .

\*\*\* For further detail on RNA\_sequencing experimental procedures, and representative command scripts for alignment of raw sequencing reads using open-source software, see the ‘Appendix on RNA-sequencing’ at the end of the Online Information. \*\*\*

**Sequence examination of RISC-targeted mRNAs for miR-499 binding sites.** Bioinformatic assessment of miR-499 binding sites in mouse mRNA targets determined from RISC-sequencing was performed using Blast2seq (NCBI) to compare the wild-type miR-499 sequence against the coding region, 5’ and 3’ UTRs of these mRNAs (downloaded from the Ensembl database, [www.ensembl.org/Mus\\_musculus](http://www.ensembl.org/Mus_musculus), release NCBI m37, annotation v60). We used an unbiased sequence-matching approach, in which at least 2 of the 6 miR-499 canonical ‘seed’ nucleotides were required to be matched, with the additional restriction that at least 6 contiguous nucleotides needed to form Watson-Crick base pairs (with the *g:u* pair included in this definition<sup>10</sup>).

**Unbiased proteomic and phosphoproteomic analysis.** Two-dimensional differential in-gel electrophoresis (DiGE) was performed at Applied Biomics (Hayward, CA). 60 µg of mouse ventricular homogenates were labeled with Cy3 or Cy5 dyes (GE Healthcare), mixed, and resolved in the first dimension on a pH gradient from 4 to 9, and in the second dimension on 12% SDS-PAGE. Immediately following SDS-PAGE, proteins were visualized using a Typhoon TRIO laser scanner and analyzed by Image QuanTL software (GE Healthcare). In-gel analysis of differential protein expression was carried out with DeCyder software. Five 2D DiGE gels were analyzed, each containing nontransgenic and miR-499 transgenic heart samples. A 1.2-fold cutoff in 3 of 5 pairwise comparisons was set to determine whether differential regulation took place.

For protein identification, spots of interest were chosen using an Ettan Spot Picker (Amersham BioSciences) and digested in-gel with modified porcine trypsin protease (Trypsin Gold, Promega). Tryptic peptides were desalted and concentrated on ZipTip C18 (Millipore), eluted in 0.5 µL of matrix solution ( $\alpha$ -cyano-4-hydroxycinnamic acid [5 mg/mL in 50% acetonitrile, 0.1% trifluoroacetic acid, 25 mmol/L ammonium bicarbonate]), and spotted on a MALDI plate (model ABI 01-192-6-AB). MALDI-TOF MS (matrix-assisted laser desorption/ionization–time-of-flight MS) and TOF/TOF tandem MS/MS were performed on an ABI 4700 mass spectrometer (Applied Biosystems, Framingham, Mass). MALDI-TOF mass spectra were acquired in reflection positive ion mode, averaging 4000 laser shots per spectrum. TOF/TOF tandem MS fragmentation spectra were acquired for each sample, averaging 4000 laser shots per fragmentation spectrum on each of the 10 most abundant ions present in each sample (excluding trypsin autolytic peptides and other known background ions). Peptide mass and associated fragmentation spectra were submitted to a GPS Explorer workstation equipped with the MASCOT search engine (Matrix Science) to search the nonredundant database of the National Center for Biotechnology Information (NCBI-nr). Searches were performed without constraining protein molecular weight or isoelectric point, with variable carbamidomethylation of cysteine and oxidation of methionine residues, and with 1 missed cleavage also allowed in the search parameters. Candidates with either a protein score confidence interval percentage or ion confidence interval percentage of >95% were considered significant.

For phosphoproteome analysis and 2D immunoblotting, 2D DiGE was performed on 150 µg of Cy5-labeled mouse ventricular homogenates. Phosphoprotein staining used the ProQ-diamond staining kit (Invitrogen). Primary antibodies for 1D and 2D immunoblots were from Cell Signaling Technology (anti-HSP90 $\beta$ , #5087; anti-PP1 $\alpha$ , #2582). Anti-rabbit secondary antibodies were HRP-conjugated from Cell Signaling Technology (1D immunoblot) or Cy3-labeled anti-rabbit IgG antibodies from Applied Biomics.

**Statistical analysis.** Unless otherwise specified, all data are presented as mean  $\pm$  s.e.m and P-values were calculated using Student’s unpaired t-test (for two groups) or 1-way ANOVA (for more than 2 groups). Statistical significance was taken at P<0.05. Comparison of transcriptomic data sets, including calculation of false discovery rates, was performed using Partek Genomics Suite 6.5; significance was

taken at  $P < 0.005$  ( $FDR < 0.05$ ). The online software suite MetaCore<sup>11</sup> was used to perform gene ontology and gene set categorization, and enrichment analyses. mRNA enrichment was assigned at  $P < 0.05$  in categories above the level predicted from the hypergeometric distribution.

**Online Table I: Downregulated miR-499 targets in human heart failure.**

| Gene symbol | Gene name                                                                             | Fold-change (HF vs NF) | p-value (HF vs NF) |
|-------------|---------------------------------------------------------------------------------------|------------------------|--------------------|
| ADAT2       | adenosine deaminase, tRNA-specific 2, TAD2 homolog ( <i>S. cerevisiae</i> )           | -1.3                   | 3.0E-04            |
| AEBP2       | AE binding protein 2                                                                  | -1.3                   | 2.1E-02            |
| ALPL        | alkaline phosphatase, liver/bone/kidney                                               | -1.2                   | 2.1E-03            |
| ANKRD13C    | ankyrin repeat domain 13C                                                             | -1.5                   | 4.3E-02            |
| ANKRD40     | ankyrin repeat domain 40                                                              | -1.7                   | 1.6E-03            |
| ARHGAP23    | Rho GTPase activating protein 23                                                      | -1.6                   | 9.8E-03            |
| ARHGAP32    | Rho GTPase activating protein 32                                                      | -2.6                   | 5.0E-03            |
| ATF7        | activating transcription factor 7                                                     | -1.3                   | 2.9E-02            |
| BTG1        | B-cell translocation gene 1, anti-proliferative                                       | -1.2                   | 8.6E-03            |
| CASK        | calcium/calmodulin-dependent serine protein kinase (MAGUK family)                     | -1.3                   | 2.6E-02            |
| COMMD2      | COMM domain containing 2                                                              | -1.6                   | 3.8E-02            |
| COPS3       | COP9 constitutive photomorphogenic homolog subunit 3 ( <i>Arabidopsis</i> )           | -1.4                   | 2.6E-03            |
| CPM         | carboxypeptidase M                                                                    | -2.1                   | 2.3E-07            |
| CPSF2       | cleavage and polyadenylation specific factor 2, 100kDa                                | -1.4                   | 3.4E-02            |
| DCAF12      | DDB1 and CUL4 associated factor 12                                                    | -1.5                   | 1.8E-02            |
| DCUN1D5     | DCN1, defective in cullin neddylation 1, domain containing 5 ( <i>S. cerevisiae</i> ) | -1.3                   | 2.0E-03            |
| DENND4C     | DENN/MADD domain containing 4C                                                        | -1.5                   | 4.0E-02            |
| DNAJC15     | DnaJ (Hsp40) homolog, subfamily C, member 15                                          | -1.6                   | 4.3E-03            |
| DNM1L       | dynamamin 1-like                                                                      | -1.4                   | 3.8E-02            |
| DPY19L3     | dpy-19-like 3 ( <i>C. elegans</i> )                                                   | -1.3                   | 1.8E-02            |
| EDNRB       | endothelin receptor type B                                                            | -2.0                   | 8.1E-07            |
| EFNB1       | ephrin-B1                                                                             | -1.2                   | 1.8E-04            |
| EPS8        | epidermal growth factor receptor pathway substrate 8                                  | -1.0                   | 9.4E-04            |
| ERLIN1      | ER lipid raft associated 1                                                            | -1.2                   | 8.5E-03            |
| ERO1L       | ERO1-like ( <i>S. cerevisiae</i> )                                                    | -1.6                   | 1.4E-03            |
| ETNK1       | ethanolamine kinase 1                                                                 | -1.4                   | 9.2E-03            |
| FAM168A     | family with sequence similarity 168, member A                                         | -1.2                   | 3.1E-02            |
| FAM169A     | family with sequence similarity 169, member A                                         | -1.4                   | 4.4E-02            |
| FGF2        | fibroblast growth factor 2 (basic)                                                    | -1.3                   | 1.9E-02            |
| FKBP5       | FK506 binding protein 5                                                               | -2.2                   | 5.7E-06            |
| FNDC3A      | fibronectin type III domain containing 3A                                             | -1.5                   | 3.6E-02            |
| GMFB        | glia maturation factor, beta                                                          | -1.7                   | 7.5E-03            |
| H3F3B       | H3 histone, family 3B (H3.3B)                                                         | -1.2                   | 4.4E-02            |
| ILF3        | interleukin enhancer binding factor 3, 90kDa                                          | -1.5                   | 4.7E-03            |
| IRS2        | insulin receptor substrate 2                                                          | -1.2                   | 4.8E-03            |

| Gene symbol | Gene name                                                                                      | Fold-change (HF vs NF) | p-value (HF vs NF) |
|-------------|------------------------------------------------------------------------------------------------|------------------------|--------------------|
| JPH1        | junctophilin 1                                                                                 | -1.4                   | 2.7E-04            |
| KATNAL1     | katanin p60 subunit A-like 1                                                                   | -3.3                   | 3.3E-03            |
| KPNA3       | karyopherin alpha 3 (importin alpha 4)                                                         | -1.5                   | 3.4E-02            |
| LHFPL2      | lipoma HMGIC fusion partner-like 2                                                             | -1.2                   | 1.3E-03            |
| LRRC8A      | leucine rich repeat containing 8 family, member A                                              | -1.5                   | 8.9E-07            |
| MAMDC2      | MAM domain containing 2                                                                        | -1.6                   | 1.4E-05            |
| MARK2       | MAP/microtubule affinity-regulating kinase 2                                                   | -1.2                   | 2.5E-02            |
| MBNL3       | muscleblind-like 3                                                                             | -1.3                   | 3.7E-03            |
| MDM2        | Mdm2 p53 binding protein homolog (mouse)                                                       | -1.4                   | 1.7E-02            |
| MED13L      | mediator complex subunit 13-like                                                               | -1.2                   | 4.1E-02            |
| MON2        | MON2 homolog (S. cerevisiae)                                                                   | -1.5                   | 4.2E-02            |
| MYLK3       | myosin light chain kinase 3                                                                    | -1.8                   | 3.0E-02            |
| NAP1L1      | nucleosome assembly protein 1-like 1                                                           | -1.5                   | 3.1E-02            |
| NIPA2       | non imprinted in Prader-Willi/Angelman syndrome 2                                              | -1.5                   | 6.3E-03            |
| NPLOC4      | nuclear protein localization 4 homolog (S. cerevisiae)                                         | -1.2                   | 9.8E-03            |
| NRIP1       | nuclear receptor interacting protein 1                                                         | -1.5                   | 1.7E-02            |
| NUFIP2      | nuclear fragile X mental retardation protein interacting protein 2                             | -1.6                   | 3.7E-02            |
| OSBPL1A     | oxysterol binding protein-like 1A                                                              | -1.2                   | 1.9E-02            |
| P4HA1       | procollagen-proline, 2-oxoglutarate 4-dioxygenase (proline 4-hydroxylase), alpha polypeptide I | -1.7                   | 2.6E-02            |
| PARVA       | parvin, alpha                                                                                  | -1.4                   | 3.6E-04            |
| PDCD4       | programmed cell death 4 (neoplastic transformation inhibitor)                                  | -1.5                   | 5.0E-02            |
| PECAM1      | platelet/endothelial cell adhesion molecule (CD31 antigen)                                     | -1.6                   | 2.4E-04            |
| PGRMC2      | progesterone receptor membrane component 2                                                     | -1.2                   | 4.2E-02            |
| PHF17       | PHD finger protein 17                                                                          | -1.2                   | 3.9E-02            |
| PIM1        | pim-1 oncogene                                                                                 | -1.4                   | 9.7E-05            |
| PPM1D       | protein phosphatase 1D magnesium-dependent, delta isoform                                      | -1.3                   | 1.3E-03            |
| PPP3CA      | protein phosphatase 3 (formerly 2B), catalytic subunit, alpha isoform                          | -1.3                   | 4.8E-02            |
| PRKX        | protein kinase, X-linked                                                                       | -1.2                   | 2.9E-03            |
| PTP4A1      | protein tyrosine phosphatase type IVA, member 1                                                | -1.4                   | 2.5E-02            |
| RAB22A      | RAB22A, member RAS oncogene family                                                             | -1.5                   | 5.6E-03            |
| RAB5C       | RAB5C, member RAS oncogene family                                                              | -1.7                   | 7.6E-05            |
| RAB8B       | RAB8B, member RAS oncogene family                                                              | -1.6                   | 4.8E-03            |
| RFFL        | ring finger and FYVE-like domain containing 1                                                  | -1.3                   | 4.4E-03            |

| Gene symbol | Gene name                                                                | Fold-change (HF vs NF) | p-value (HF vs NF) |
|-------------|--------------------------------------------------------------------------|------------------------|--------------------|
| RNF114      | ring finger protein 114                                                  | -1.4                   | 1.7E-02            |
| ROD1        | ROD1 regulator of differentiation 1 (S. pombe)                           | -1.9                   | 2.0E-03            |
| RRP15       | ribosomal RNA processing 15 homolog (S. cerevisiae)                      | -1.6                   | 2.9E-02            |
| RRP1B       | ribosomal RNA processing 1 homolog B (S. cerevisiae)                     | -1.4                   | 1.3E-03            |
| SAMD4B      | sterile alpha motif domain containing 4B                                 | -1.2                   | 9.5E-03            |
| SAMD8       | sterile alpha motif domain containing 8                                  | -1.5                   | 3.5E-03            |
| SEL1L       | sel-1 suppressor of lin-12-like (C. elegans)                             | -1.6                   | 4.7E-03            |
| SF3B3       | splicing factor 3b, subunit 3, 130kDa                                    | -1.3                   | 3.9E-02            |
| SH3BGRL2    | SH3 domain binding glutamic acid-rich protein like 2                     | -1.2                   | 5.1E-03            |
| SMAD4       | SMAD family member 4                                                     | -1.4                   | 2.2E-02            |
| SOS2        | son of sevenless homolog 2 (Drosophila)                                  | -1.6                   | 3.7E-02            |
| SPRED1      | sprouty-related, EVH1 domain containing 1                                | -1.4                   | 1.6E-02            |
| SPRY1       | sprouty homolog 1, antagonist of FGF signaling (Drosophila)              | -1.2                   | 1.9E-02            |
| STK4        | serine/threonine kinase 4                                                | -1.3                   | 1.4E-02            |
| SUV39H1     | suppressor of variegation 3-9 homolog 1 (Drosophila)                     | -1.2                   | 2.5E-02            |
| SYAP1       | synapse associated protein 1, SAP47 homolog (Drosophila)                 | -1.4                   | 1.9E-02            |
| TBC1D15     | TBC1 domain family, member 15                                            | -1.4                   | 2.8E-02            |
| TCF12       | transcription factor 12 (HTF4, helix-loop-helix transcription factors 4) | -1.3                   | 1.9E-02            |
| TMBIM6      | transmembrane BAX inhibitor motif containing 6                           | -1.4                   | 2.0E-03            |
| TMEM2       | transmembrane protein 2                                                  | -1.6                   | 6.6E-05            |
| TMX1        | thioredoxin-related transmembrane protein 1                              | -1.5                   | 9.1E-04            |
| TSPAN3      | tetraspanin 3                                                            | -1.5                   | 1.3E-02            |
| UBE2V1      | ubiquitin-conjugating enzyme E2 variant 1                                | -1.3                   | 4.1E-02            |
| USP47       | ubiquitin specific peptidase 47                                          | -1.6                   | 4.5E-02            |
| WAC         | WW domain containing adaptor with coiled-coil                            | -1.3                   | 3.8E-02            |
| WNK3        | WNK lysine deficient protein kinase 3                                    | -1.4                   | 1.2E-03            |
| YAF2        | YY1 associated factor 2                                                  | -1.4                   | 4.8E-02            |
| YIPF6       | Yip1 domain family, member 6                                             | -1.3                   | 2.9E-02            |
| ZDHHC2      | zinc finger, DHHC-type containing 2                                      | -1.6                   | 1.5E-02            |
| ZDHHC9      | zinc finger, DHHC-type containing 9                                      | -1.5                   | 9.7E-04            |

**Online Table I.** Downregulated miR-499 targets, predicted by TargetScan 6, in human heart failure. mRNA expression was assessed on Affymetrix HuEx v1.0 Exon arrays and analyzed using Partek Genomics Suite. A heatmap corresponding to these data is given in **Figure 1c**. NF, nonfailing; HF, heart failure of ischemic or nonischemic origin. Downregulation was defined as a fold-change <-1.2, P<0.05.



**Online Table II: Statistical comparison of LVEDD and FS% values for nontransgenic and miR-499 transgenic mice.**

| LVEDD |           |        |        |                |                        |                        |
|-------|-----------|--------|--------|----------------|------------------------|------------------------|
|       | 6 wk mean | s.e.m. | 6 wk n | P-value vs ntg | P-value TG-16 vs TG-15 | P-value TG-16 vs TG-53 |
| ntg   | 3.5       | 0.04   | 15     |                |                        |                        |
| TG-16 | 3.6       | 0.05   | 13     | P > 0.05       |                        |                        |
| TG-15 | 4.0       | 0.08   | 4      | P < 0.01       | P < 0.05               |                        |
| TG-53 | 3.7       | 0.14   | 5      | P > 0.05       |                        | P > 0.05               |

| LVEDD |            |        |         |                |                        |                        |
|-------|------------|--------|---------|----------------|------------------------|------------------------|
|       | 20 wk mean | s.e.m. | 20 wk n | P-value vs ntg | P-value TG-16 vs TG-15 | P-value TG-16 vs TG-53 |
| ntg   | 3.6        | 0.04   | 18      |                |                        |                        |
| TG-16 | 4.0        | 0.06   | 12      | P < 0.001      |                        |                        |
| TG-15 | 4.5        | 0.08   | 4       | P < 0.001      | P < 0.01               |                        |
| TG-53 | 4.4        | 0.26   | 7       | P < 0.001      |                        | P < 0.01               |

| FS%   |           |        |        |                |                        |                        |
|-------|-----------|--------|--------|----------------|------------------------|------------------------|
|       | 6 wk mean | s.e.m. | 6 wk n | P-value vs ntg | P-value TG-16 vs TG-15 | P-value TG-16 vs TG-53 |
| ntg   | 73.0      | 0.8    | 15     |                |                        |                        |
| TG-16 | 65.9      | 1.5    | 13     | P < 0.01       |                        |                        |
| TG-15 | 58.0      | 2.8    | 4      | P < 0.001      | P < 0.05               |                        |
| TG-53 | 64.1      | 2.8    | 5      | P < 0.01       |                        | P > 0.05               |

| FS%   |            |        |         |                |                        |                        |
|-------|------------|--------|---------|----------------|------------------------|------------------------|
|       | 20 wk mean | s.e.m. | 20 wk n | P-value vs ntg | P-value TG-16 vs TG-15 | P-value TG-16 vs TG-53 |
| ntg   | 70.6       | 1.7    | 18      |                |                        |                        |
| TG-16 | 59.4       | 1.3    | 12      | P < 0.001      |                        |                        |
| TG-15 | 46.3       | 2.2    | 4       | P < 0.001      | P < 0.001              |                        |
| TG-53 | 52.5       | 3.4    | 7       | P < 0.001      |                        | P < 0.05               |

**Online Table II.** *Statistical comparison of LVEDD and FS% values for nontransgenic and miR-499 transgenic mice.* Two-way ANOVA was performed with GraphPad Prism to determine differences between miR-499 and nontransgenic mice at two different ages, and also to evaluate the interaction of genotype and time. The interaction term for genotype and time was significant for LVEDD (P=0.035), meaning that genotype did not have the same effect at both times. The interaction term for genotype and term was not significant for FS% (P=0.11). P-values for pairwise comparisons were obtained from Bonferroni post-tests in GraphPad Prism.

**Online Table III: Regulated mRNAs in 4 week-old and 8 week-old miR-499 transgenic (TG-16) hearts.**

| Gene symbols  | 4-wk ntg mean | 8-wk ntg mean | Fold-change 4-wk TG-16/ntg | p-value | Fold-change 8-wk TG-16/ntg | 8-wk p-value |
|---------------|---------------|---------------|----------------------------|---------|----------------------------|--------------|
| Mt2           | 59.6          | 65.0          | 4.6                        | 1.4E-02 | 2.6                        | 4.1E-02      |
| Xist          | 8.2           | 3.6           | 2.8                        | 4.1E-02 | 1.2                        | 8.5E-01      |
| Klhl34        | 3.2           | 2.8           | 2.7                        | 1.2E-04 | 2.6                        | 9.4E-05      |
| Acta1         | 503.8         | 574.3         | 2.6                        | 7.9E-04 | 2.4                        | 1.0E-02      |
| Gbp11         | 3.2           | 3.0           | 2.6                        | 6.1E-03 | 1.7                        | 2.3E-02      |
| Prune2        | 8.6           | 8.0           | 2.3                        | 3.9E-04 | 2.4                        | 2.1E-03      |
| Lrp11         | 3.9           | 5.7           | 2.2                        | 4.4E-02 | 1.9                        | 5.5E-02      |
| Tmem52        | 3.6           | 3.7           | 2.1                        | 1.3E-03 | 2.3                        | 2.0E-02      |
| Clu           | 182.2         | 196.7         | 2.1                        | 1.1E-04 | 1.5                        | 5.5E-02      |
| Ntng2         | 5.7           | 6.7           | 2.0                        | 3.9E-04 | 1.9                        | 5.5E-04      |
| Mt1           | 593.6         | 623.3         | 1.8                        | 1.5E-03 | 1.5                        | 7.6E-03      |
| Nkain1        | 6.2           | 7.5           | 1.7                        | 1.3E-03 | 1.6                        | 3.1E-04      |
| Dedd          | 34.0          | 30.1          | 1.7                        | 4.7E-02 | 1.2                        | 1.3E-01      |
| Srrm4         | 4.2           | 4.8           | 1.7                        | 8.4E-03 | 1.4                        | 5.3E-02      |
| Mgp           | 392.7         | 301.3         | 1.7                        | 2.4E-04 | 1.8                        | 1.2E-02      |
| Scx           | 4.1           | 4.8           | 1.7                        | 6.4E-03 | 1.3                        | 4.8E-02      |
| Runx1t1       | 3.4           | 3.9           | 1.7                        | 6.9E-03 | 1.4                        | 1.6E-01      |
| Gsta3         | 4.6           | 7.3           | 1.7                        | 4.0E-02 | 1.7                        | 4.7E-02      |
| Dnaic1        | 3.8           | 2.1           | 1.7                        | 2.9E-02 | 1.6                        | 1.1E-01      |
| Fhl1          | 112.2         | 98.3          | 1.7                        | 2.8E-04 | 1.6                        | 1.4E-03      |
| Mad2l2        | 8.2           | 9.3           | 1.7                        | 1.8E-02 | 1.6                        | 1.3E-02      |
| Map2k6        | 3.7           | 3.1           | 1.7                        | 1.7E-02 | 1.6                        | 3.9E-02      |
| Comt1         | 99.8          | 89.7          | 1.6                        | 1.1E-08 | 1.6                        | 4.1E-04      |
| Cd40          | 3.9           | 4.3           | 1.6                        | 1.7E-02 | 1.5                        | 1.2E-01      |
| Lrp4          | 3.0           | 2.8           | 1.6                        | 1.3E-02 | 1.3                        | 1.7E-01      |
| Acot9         | 9.0           | 7.1           | 1.6                        | 1.6E-02 | 1.4                        | 3.2E-02      |
| H2-Aa         | 17.4          | 13.3          | 1.6                        | 9.1E-03 | 1.8                        | 4.4E-02      |
| Fam46a        | 7.4           | 5.0           | 1.6                        | 6.2E-03 | 2.0                        | 3.8E-04      |
| Pik3r3        | 3.7           | 2.8           | 1.6                        | 8.3E-03 | 2.0                        | 1.5E-04      |
| 2310028H24Rik | 8.9           | 9.1           | 1.5                        | 1.3E-02 | 1.4                        | 3.3E-03      |
| Ephb3         | 4.8           | 4.6           | 1.5                        | 1.4E-02 | 1.7                        | 3.9E-03      |
| St6galnac2    | 7.9           | 7.2           | 1.5                        | 1.0E-02 | 1.6                        | 4.9E-03      |
| Lhx6          | 3.5           | 3.3           | 1.5                        | 4.7E-02 | 1.6                        | 1.2E-01      |
| Tnik          | 10.7          | 11.7          | 1.5                        | 6.0E-03 | 1.5                        | 1.3E-03      |
| Glns-ps1      | 50.0          | 41.1          | 1.5                        | 2.2E-02 | 1.8                        | 8.1E-03      |
| Cyr61         | 31.2          | 23.7          | 1.4                        | 2.8E-02 | 2.0                        | 4.2E-02      |

| Gene symbols  | 4-wk ntg mean | 8-wk ntg mean | Fold-change 4-wk TG-16/ntg | p-value | Fold-change 8-wk TG-16/ntg | 8-wk p-value |
|---------------|---------------|---------------|----------------------------|---------|----------------------------|--------------|
| Dgat2         | 67.8          | 79.7          | 1.4                        | 4.1E-03 | 1.8                        | 7.1E-05      |
| Cd74          | 68.8          | 77.8          | 1.4                        | 6.8E-03 | 1.9                        | 2.0E-02      |
| Cacnb1        | 4.0           | 4.2           | 1.4                        | 3.1E-02 | 1.5                        | 1.6E-02      |
| Tia1          | 16.5          | 13.5          | 1.4                        | 7.6E-03 | 1.2                        | 2.3E-01      |
| Ddx49         | 19.1          | 15.6          | 1.4                        | 2.4E-02 | 1.3                        | 5.4E-02      |
| Urgcp         | 18.2          | 17.5          | 1.4                        | 9.3E-03 | 1.3                        | 8.7E-02      |
| Kremen1       | 37.0          | 34.0          | 1.4                        | 7.5E-04 | 1.6                        | 4.9E-04      |
| Homer2        | 25.1          | 22.5          | 1.4                        | 3.9E-05 | 1.3                        | 2.0E-02      |
| Prodh         | 27.2          | 25.5          | 1.4                        | 7.3E-03 | 1.4                        | 9.6E-03      |
| Adprhl1       | 318.0         | 276.8         | 1.4                        | 3.9E-06 | 1.3                        | 1.2E-02      |
| H2-Ab1        | 14.4          | 11.9          | 1.4                        | 4.5E-02 | 2.0                        | 3.1E-02      |
| Podn          | 10.0          | 10.3          | 1.4                        | 1.5E-02 | 1.5                        | 1.1E-02      |
| Cyb5rl        | 11.8          | 11.1          | 1.4                        | 4.2E-02 | 1.2                        | 1.6E-01      |
| Camk2b        | 4.7           | 4.8           | 1.4                        | 1.1E-02 | 1.9                        | 3.5E-02      |
| Coq4          | 20.0          | 18.2          | 1.4                        | 3.9E-02 | 1.3                        | 1.3E-01      |
| Nol6          | 7.6           | 6.5           | 1.4                        | 3.7E-02 | 1.5                        | 5.0E-02      |
| Odf2          | 27.7          | 23.4          | 1.4                        | 4.7E-02 | 1.5                        | 1.1E-05      |
| Rps6kc1       | 8.9           | 6.8           | 1.4                        | 2.3E-02 | 1.2                        | 2.1E-01      |
| Adam11        | 12.8          | 10.6          | 1.4                        | 4.6E-02 | 1.8                        | 6.1E-03      |
| Icosl         | 3.6           | 3.3           | 1.4                        | 1.6E-02 | 1.8                        | 7.8E-02      |
| Thrsp         | 19.0          | 21.6          | 1.3                        | 3.5E-02 | 1.4                        | 2.6E-02      |
| Mrap          | 10.4          | 9.2           | 1.3                        | 1.4E-02 | 1.2                        | 1.9E-01      |
| Itfg2         | 3.2           | 2.7           | 1.3                        | 1.7E-03 | 1.2                        | 7.2E-02      |
| Patz1         | 9.4           | 9.5           | 1.3                        | 1.4E-02 | 1.5                        | 7.2E-04      |
| Wdr6          | 3.8           | 3.1           | 1.3                        | 4.2E-02 | 1.3                        | 4.6E-02      |
| Dffa          | 14.7          | 15.2          | 1.3                        | 2.2E-02 | 1.2                        | 2.0E-01      |
| Tmtc1         | 17.6          | 19.7          | 1.3                        | 1.0E-02 | 1.2                        | 5.4E-02      |
| Cry2          | 8.9           | 7.5           | 1.3                        | 1.9E-02 | 1.6                        | 3.3E-03      |
| D630003M21Rik | 3.5           | 3.0           | 1.3                        | 3.0E-02 | 1.5                        | 1.3E-01      |
| Klhl17        | 5.3           | 4.6           | 1.3                        | 3.4E-03 | 1.3                        | 6.8E-02      |
| Rab11fip3     | 13.5          | 11.7          | 1.3                        | 3.5E-03 | 1.5                        | 3.0E-03      |
| E4f1          | 4.9           | 4.8           | 1.3                        | 4.1E-02 | 1.3                        | 2.0E-02      |
| Golga4        | 66.4          | 57.3          | 1.3                        | 1.5E-04 | 1.2                        | 4.6E-02      |
| Irak2         | 7.1           | 6.0           | 1.3                        | 4.1E-02 | 1.4                        | 1.2E-01      |
| Hspb7         | 683.0         | 711.8         | 1.3                        | 1.4E-03 | 1.3                        | 2.2E-02      |
| Eml3          | 3.7           | 3.2           | 1.3                        | 1.2E-02 | 1.2                        | 2.4E-02      |
| Cpeb3         | 28.4          | 32.2          | 1.3                        | 1.3E-02 | 1.2                        | 1.3E-01      |
| Kcnj12        | 12.6          | 11.0          | 1.3                        | 5.7E-03 | 1.4                        | 1.8E-03      |
| Slc39a13      | 32.0          | 26.0          | 1.3                        | 4.5E-02 | 1.2                        | 8.9E-02      |

| Gene symbols  | 4-wk ntg mean | 8-wk ntg mean | Fold-change 4-wk TG-16/ntg | p-value | Fold-change 8-wk TG-16/ntg | 8-wk p-value |
|---------------|---------------|---------------|----------------------------|---------|----------------------------|--------------|
| Taf15         | 15.6          | 13.6          | 1.3                        | 2.4E-02 | 1.2                        | 7.5E-03      |
| Mlxipl        | 21.0          | 18.5          | 1.3                        | 3.7E-02 | 1.3                        | 6.6E-02      |
| Ptpn11        | 86.8          | 73.9          | 1.2                        | 3.8E-04 | 1.4                        | 1.5E-03      |
| Ahnak         | 72.3          | 85.7          | 1.2                        | 3.8E-03 | 1.4                        | 6.2E-04      |
| Flot1         | 72.2          | 63.3          | 1.2                        | 2.0E-03 | 1.4                        | 6.7E-04      |
| Smarca2       | 12.2          | 10.7          | 1.2                        | 2.7E-02 | 1.7                        | 1.2E-04      |
| Fem1a         | 65.4          | 56.5          | 1.2                        | 2.1E-03 | 1.3                        | 2.8E-03      |
| Camk2a        | 18.0          | 15.3          | 1.2                        | 2.9E-02 | 1.5                        | 5.0E-02      |
| Dmap1         | 8.6           | 7.2           | 1.2                        | 4.6E-02 | 1.4                        | 2.9E-02      |
| Fmr1          | 5.4           | 4.9           | 1.2                        | 4.1E-02 | 1.2                        | 3.4E-01      |
| Pdk1          | 107.9         | 96.9          | 1.2                        | 4.1E-02 | 1.2                        | 2.3E-02      |
| Mn1           | 4.9           | 3.9           | 1.2                        | 9.1E-03 | 2.8                        | 8.8E-04      |
| 4931440F15Rik | 9.4           | 8.6           | 1.2                        | 3.2E-02 | 1.4                        | 2.1E-03      |
| Scand3        | 66.1          | 79.8          | -1.2                       | 2.2E-02 | -1.4                       | 1.6E-02      |
| Eif3j         | 5.1           | 5.7           | -1.2                       | 3.2E-02 | -1.3                       | 2.3E-03      |
| Pde4a         | 37.0          | 39.4          | -1.2                       | 4.7E-02 | -1.2                       | 1.0E-01      |
| Mrpl34        | 81.5          | 80.7          | -1.2                       | 2.5E-03 | -1.4                       | 3.0E-04      |
| Tnnt2         | 5118.2        | 4918.5        | -1.2                       | 7.4E-05 | -1.4                       | 3.7E-03      |
| Atp5d         | 927.1         | 1069.8        | -1.2                       | 2.0E-02 | -1.2                       | 9.2E-04      |
| Dnajc19       | 26.8          | 19.7          | -1.2                       | 2.9E-02 | -1.6                       | 1.1E-01      |
| Atp5g3        | 1339.6        | 1582.0        | -1.3                       | 5.2E-04 | -1.3                       | 1.1E-03      |
| Yaf2          | 5.7           | 4.8           | -1.3                       | 1.3E-02 | -1.2                       | 4.9E-03      |
| Pgp           | 22.5          | 23.4          | -1.3                       | 1.2E-02 | -1.2                       | 2.3E-02      |
| Rhot2         | 60.3          | 69.6          | -1.3                       | 2.5E-03 | -1.4                       | 6.2E-04      |
| Mrpl17        | 27.4          | 24.2          | -1.3                       | 1.5E-02 | -1.5                       | 4.8E-05      |
| Snrpn         | 14.7          | 12.6          | -1.3                       | 5.5E-03 | -1.4                       | 3.4E-02      |
| Aes           | 721.6         | 860.3         | -1.3                       | 2.3E-03 | -1.4                       | 3.1E-03      |
| Gm8325        | 27.7          | 25.0          | -1.3                       | 1.8E-04 | -1.3                       | 4.7E-03      |
| Mpst          | 17.4          | 18.0          | -1.3                       | 3.4E-03 | -1.2                       | 1.9E-02      |
| 2010107H07Rik | 64.4          | 71.4          | -1.3                       | 3.8E-02 | -1.7                       | 8.1E-03      |
| Maob          | 5.6           | 4.6           | -1.3                       | 2.8E-02 | -1.2                       | 4.1E-01      |
| Iscu          | 120.3         | 109.3         | -1.4                       | 3.0E-02 | -1.4                       | 7.0E-03      |
| St6galnac6    | 81.9          | 76.7          | -1.4                       | 8.3E-03 | -1.3                       | 2.7E-03      |
| Hhatl         | 69.7          | 63.6          | -1.4                       | 2.8E-05 | -1.2                       | 3.1E-02      |
| Fbxl22        | 104.1         | 99.4          | -1.4                       | 2.6E-02 | -1.4                       | 1.5E-02      |
| Ano10         | 21.4          | 20.9          | -1.4                       | 5.1E-04 | -2.2                       | 7.8E-03      |
| 2610528E23Rik | 32.0          | 23.6          | -1.4                       | 3.7E-02 | -1.4                       | 6.1E-03      |
| Rpia          | 4.1           | 3.6           | -1.4                       | 4.4E-02 | -1.2                       | 6.3E-02      |
| Akt1          | 46.4          | 32.1          | -1.5                       | 1.6E-03 | -1.3                       | 6.4E-03      |

| Gene symbols | 4-wk ntg mean | 8-wk ntg mean | Fold-change 4-wk TG-16/ntg | p-value | Fold-change 8-wk TG-16/ntg | 8-wk p-value |
|--------------|---------------|---------------|----------------------------|---------|----------------------------|--------------|
| Cish         | 38.5          | 45.3          | -1.5                       | 4.6E-02 | -1.8                       | 1.6E-02      |
| Ppil1        | 31.0          | 33.4          | -1.5                       | 4.2E-03 | -1.8                       | 3.2E-04      |
| Naprt1       | 8.7           | 8.8           | -1.5                       | 1.7E-03 | -1.4                       | 3.0E-02      |
| Wnk4         | 5.5           | 4.6           | -1.5                       | 8.5E-03 | -1.3                       | 2.1E-01      |
| Fbxo44       | 9.7           | 11.1          | -1.5                       | 6.6E-03 | -2.2                       | 1.7E-03      |
| Fhl3         | 7.1           | 5.3           | -1.6                       | 7.6E-03 | -1.2                       | 3.9E-01      |
| Pvrl2        | 10.9          | 10.3          | -1.6                       | 1.1E-03 | -1.2                       | 6.1E-02      |
| Slc25a11     | 546.1         | 490.5         | -1.6                       | 1.7E-05 | -1.5                       | 5.6E-04      |
| Metrn        | 13.9          | 16.9          | -1.6                       | 1.2E-02 | -1.4                       | 8.7E-02      |
| Cadm4        | 7.3           | 8.2           | -1.7                       | 2.1E-03 | -1.5                       | 2.5E-03      |
| Gm5745       | 6.8           | 10.1          | -1.7                       | 1.8E-02 | -1.6                       | 6.8E-02      |
| Slc17a7      | 7.0           | 8.2           | -1.7                       | 1.4E-03 | -3.1                       | 1.6E-03      |
| Spint2       | 53.0          | 58.4          | -1.8                       | 1.6E-02 | -1.9                       | 1.8E-02      |
| Gpt          | 19.2          | 15.7          | -1.9                       | 3.7E-05 | -1.7                       | 2.9E-03      |
| Myl4         | 4.4           | 12.5          | -1.9                       | 4.5E-02 | -8.0                       | 3.5E-01      |
| Scn1b        | 17.2          | 16.6          | -1.9                       | 5.5E-05 | -1.4                       | 2.7E-03      |
| Gsg11        | 3.8           | 3.6           | -2.0                       | 2.6E-03 | -1.8                       | 1.7E-03      |
| Apex2        | 5.1           | 5.5           | -2.1                       | 4.4E-02 | -1.9                       | 4.4E-03      |
| Art5         | 9.2           | 7.4           | -2.2                       | 1.4E-04 | -1.6                       | 2.3E-01      |
| Ramp1        | 3.6           | 2.3           | -2.3                       | 1.2E-02 | -2.1                       | 2.0E-01      |
| Gm11744      | 3.3           | 2.1           | -2.4                       | 3.4E-02 | -1.4                       | 1.6E-01      |
| Gm4532       | 3.2           | 4.2           | -2.8                       | 4.6E-02 | -2.8                       | 6.0E-02      |
| Capn3        | 9.5           | 2.8           | -10.0                      | 2.8E-02 | -1.4                       | 4.7E-01      |

**Online Table III.** *Regulated mRNAs in 4 week-old and 8 week-old miR-499 transgenic (TG-16) hearts.* mRNAs regulated in 4 week-old transgenic hearts (line TG-16) by at least 20% ( $P < 0.05$ ), and whose regulation was maintained in 8 week-old hearts are shown, ordered by fold-change in 4 week-old transgenic hearts. mRNA content is shown as copies / cell in nontransgenic hearts, with fold-regulation and p-values for regulation in transgenic hearts.

**Online Table IV: Downregulated miR-499 targets, predicted by TargetScan 6, in miR-499 transgenic mouse hearts at 4 weeks of age.**

| Gene symbol | Gene name                                                         | Copies/cell (ntg) | Copies/cell (TG-16) | Copies/cell (TG-53) | Fold-change (TG-16 vs ntg) | p-value (TG-16 vs ntg) | Fold-change (TG-53 vs ntg) | p-value (TG-53 vs ntg) |
|-------------|-------------------------------------------------------------------|-------------------|---------------------|---------------------|----------------------------|------------------------|----------------------------|------------------------|
| ARHGAP23 *  | Rho GTPase activating protein 23                                  | 6.1               | 4.8                 | 5.8                 | -1.3                       | 1.3E-02                | -1.1                       | 4.2E-01                |
| ARID2       | AT rich interactive domain 2 (ARID, RFX-like)                     | 4.4               | 3.7                 | 4.0                 | -1.2                       | 2.0E-02                | -1.1                       | 1.1E-01                |
| CCRN4L      | CCR4 carbon catabolite repression 4-like ( <i>S. cerevisiae</i> ) | 7.7               | 3.4                 | 3.7                 | -2.3                       | 3.8E-08                | -2.1                       | 7.8E-10                |
| CDH2        | cadherin 2, type 1, N-cadherin (neuronal)                         | 56.8              | 43.5                | 38.2                | -1.3                       | 6.8E-04                | -1.5                       | 7.7E-07                |
| CDKN1A      | cyclin-dependent kinase inhibitor 1A (p21, Cip1)                  | 18.1              | 12.0                | 17.4                | -1.5                       | 1.1E-03                | -1.0                       | 6.9E-01                |
| DCAF12 *    | DDB1 and CUL4 associated factor 12                                | 9.4               | 8.1                 | 8.4                 | -1.2                       | 1.6E-03                | -1.1                       | 3.1E-03                |
| DNAJB2      | DnaJ (Hsp40) homolog, subfamily B, member 2                       | 33.0              | 25.0                | 27.2                | -1.3                       | 9.5E-06                | -1.2                       | 1.6E-03                |
| DYRK2       | dual-specificity tyrosine-(Y)-phosphorylation regulated kinase 2  | 8.0               | 6.2                 | 6.8                 | -1.3                       | 2.3E-02                | -1.2                       | 6.5E-02                |
| EPM2AIP1    | EPM2A (laforin) interacting protein 1                             | 4.0               | 3.2                 | 2.7                 | -1.3                       | 1.9E-02                | -1.5                       | 1.8E-04                |
| ERRFI1      | ERBB receptor feedback inhibitor 1                                | 8.1               | 5.8                 | 6.6                 | -1.4                       | 3.9E-02                | -1.2                       | 6.4E-02                |
| FAM168A *   | family with sequence similarity 168, member A                     | 9.4               | 8.1                 | 8.5                 | -1.2                       | 2.8E-02                | -1.1                       | 6.0E-02                |
| FNIP2       | folliculin interacting protein 2                                  | 9.4               | 6.2                 | 6.7                 | -1.5                       | 3.3E-03                | -1.4                       | 3.0E-03                |
| FZD4        | frizzled homolog 4                                                | 8.3               | 6.6                 | 6.9                 | -1.3                       | 3.9E-02                | -1.2                       | 3.1E-02                |

| Gene symbol | Gene name                                                               | Copies/cell<br>(ntg) | Copies/cell<br>(TG-16) | Copies/cell<br>(TG-53) | Fold-change<br>(TG-16 vs ntg) | p-value<br>(TG-16 vs<br>ntg) | Fold-change<br>(TG-53 vs ntg) | p-value<br>(TG-53 vs<br>ntg) |
|-------------|-------------------------------------------------------------------------|----------------------|------------------------|------------------------|-------------------------------|------------------------------|-------------------------------|------------------------------|
|             | (Drosophila)                                                            |                      |                        |                        |                               |                              |                               |                              |
| H2AFZ       | H2A histone family,<br>member Z                                         | 6.6                  | 4.5                    | 4.4                    | -1.5                          | 7.9E-03                      | -1.5                          | 7.2E-04                      |
| IRS2 *      | insulin receptor<br>substrate 2                                         | 3.8                  | 2.3                    | 4.8                    | -1.7                          | 8.9E-03                      | 1.3                           | 6.8E-02                      |
| KLHDC5      | kelch domain<br>containing 5                                            | 1.2                  | 1.0                    | 1.2                    | -1.2                          | 2.0E-02                      | -1.0                          | 6.1E-01                      |
| LRRC8A *    | leucine rich repeat<br>containing 8 family,<br>member A                 | 25.7                 | 17.1                   | 22.7                   | -1.5                          | 1.9E-02                      | -1.1                          | 2.4E-01                      |
| MAPK6       | mitogen-activated<br>protein kinase 6                                   | 6.7                  | 5.8                    | 5.4                    | -1.2                          | 1.2E-02                      | -1.3                          | 3.8E-04                      |
| MAST4       | microtubule associated<br>serine/threonine<br>kinase family member<br>4 | 6.9                  | 5.6                    | 6.7                    | -1.2                          | 5.4E-03                      | -1.0                          | 5.9E-01                      |
| PACS2       | phosphofurin acidic<br>cluster sorting protein<br>2                     | 9.4                  | 7.6                    | 9.0                    | -1.2                          | 1.0E-03                      | -1.0                          | 3.3E-01                      |
| RCN2        | reticulocalbin 2, EF-<br>hand calcium binding<br>domain                 | 5.2                  | 2.8                    | 2.4                    | -1.8                          | 1.3E-03                      | -2.2                          | 3.3E-06                      |
| REEP1       | receptor accessory<br>protein 1                                         | 3.8                  | 2.3                    | 2.4                    | -1.7                          | 2.5E-05                      | -1.6                          | 7.7E-07                      |
| RNF44       | ring finger protein 44                                                  | 29.7                 | 21.3                   | 24.8                   | -1.4                          | 2.8E-02                      | -1.2                          | 2.5E-01                      |
| SLC35A4     | solute carrier family<br>35, member A4                                  | 13.3                 | 10.6                   | 9.2                    | -1.3                          | 8.5E-03                      | -1.5                          | 1.3E-05                      |
| SNRK        | SNF related kinase                                                      | 65.2                 | 50.7                   | 62.1                   | -1.3                          | 1.1E-02                      | -1.0                          | 5.0E-01                      |
| SOS2 *      | son of sevenless<br>homolog 2<br>(Drosophila)                           | 6.1                  | 4.1                    | 4.0                    | -1.5                          | 6.1E-05                      | -1.5                          | 3.4E-07                      |
| SOX6        | SRY (sex determining                                                    | 2.1                  | 1.7                    | 1.8                    | -1.2                          | 4.7E-02                      | -1.2                          | 2.6E-02                      |

| Gene symbol | Gene name                                      | Copies/cell (ntg) | Copies/cell (TG-16) | Copies/cell (TG-53) | Fold-change (TG-16 vs ntg) | p-value (TG-16 vs ntg) | Fold-change (TG-53 vs ntg) | p-value (TG-53 vs ntg) |
|-------------|------------------------------------------------|-------------------|---------------------|---------------------|----------------------------|------------------------|----------------------------|------------------------|
|             | region Y)-box 6                                |                   |                     |                     |                            |                        |                            |                        |
| SOX7        | SRY (sex determining region Y)-box 7           | 11.6              | 8.5                 | 9.8                 | -1.4                       | 1.9E-03                | -1.2                       | 2.6E-02                |
| TBC1D4      | TBC1 domain family, member 4                   | 16.4              | 11.6                | 8.8                 | -1.4                       | 3.8E-03                | -1.9                       | 8.7E-07                |
| TMBIM6 *    | transmembrane BAX inhibitor motif containing 6 | 74.7              | 53.8                | 51.8                | -1.4                       | 4.0E-03                | -1.4                       | 2.0E-04                |
| USO1        | USO1 homolog, vesicle docking protein (yeast)  | 8.0               | 6.3                 | 6.1                 | -1.3                       | 1.5E-02                | -1.3                       | 4.8E-04                |

**Online Table IV.** Downregulated miR-499 targets, predicted by TargetScan 6, in miR-499 transgenic mouse hearts at 4 weeks of age. mRNA expression was assessed by RNA-sequencing and analyzed using Partek Genomics Suite. A heatmap corresponding to these data is given in **Figure 3c**. Downregulation was defined as a fold-change <-1.2, P<0.05. Seven mRNAs also downregulated in human heart failure (see **Online Table I** and **Figure 1c**) are designated with asterisks.



**Online Table V: Direct cardiac targets of miR-499 identified by RISC-sequencing.**

| #  | Gene symbol | Gene name                                                                              | Fold miR-499<br>TG-16 / ntg | miR-499<br>TG-16 vs<br>ntg, p-value |
|----|-------------|----------------------------------------------------------------------------------------|-----------------------------|-------------------------------------|
| 1  | Rprd1b      | regulation of nuclear pre-mRNA domain containing 1B                                    | 2.5                         | 8.0E-02                             |
| 2  | Rora        | RAR-related orphan receptor A                                                          | 2.5                         | 2.8E-02                             |
| 3  | Alg10b      | asparagine-linked glycosylation 10 homolog B (yeast, alpha-1,2-glucosyltransferase)    | 2.2                         | 7.7E-05                             |
| 4  | Slc5a3      | solute carrier family 5 (inositol transporters), member 3                              | 1.9                         | 6.6E-04                             |
| 5  | Slc38a1     | solute carrier family 38, member 1                                                     | 1.8                         | 1.0E-02                             |
| 6  | Pcdh19      | protocadherin 19                                                                       | 1.7                         | 1.3E-02                             |
| 7  | Rmnd5a      | required for meiotic nuclear division 5 homolog A ( <i>S. cerevisiae</i> )             | 1.7                         | 8.4E-03                             |
| 8  | Lin7c       | lin-7 homolog C ( <i>C. elegans</i> )                                                  | 1.7                         | 2.5E-02                             |
| 9  | Ddi2        | DDI1, DNA-damage inducible 1, homolog 2 ( <i>S. cerevisiae</i> )                       | 1.7                         | 1.0E-02                             |
| 10 | Uhmk1       | U2AF homology motif (UHM) kinase 1                                                     | 1.7                         | 6.2E-03                             |
| 11 | Klhdc5      | kelch domain containing 5                                                              | 1.7                         | 1.0E-02                             |
| 12 | Gna13       | guanine nucleotide binding protein (G protein), alpha 13                               | 1.7                         | 6.5E-03                             |
| 13 | Dcp2        | DCP2 decapping enzyme homolog ( <i>S. cerevisiae</i> )                                 | 1.7                         | 8.7E-02                             |
| 14 | Tet3        | tet oncogene family member 3                                                           | 1.7                         | 2.3E-02                             |
| 15 | Dnajb14     | DnaJ (Hsp40) homolog, subfamily B, member 14                                           | 1.7                         | 1.0E-02                             |
| 16 | Map3k2      | mitogen-activated protein kinase kinase kinase 2                                       | 1.7                         | 3.0E-02                             |
| 17 | Cpne3       | copine III                                                                             | 1.7                         | 2.0E-02                             |
| 18 | Sacm11      | SAC1 suppressor of actin mutations 1-like (yeast)                                      | 1.6                         | 5.9E-02                             |
| 19 | Atxn1l      | ataxin 1-like                                                                          | 1.6                         | 5.5E-02                             |
| 20 | Ppargc1b    | peroxisome proliferator-activated receptor gamma, coactivator 1 beta                   | 1.6                         | 3.7E-02                             |
| 21 | Taok1       | TAO kinase 1                                                                           | 1.6                         | 3.4E-04                             |
| 22 | Hipk2       | homeodomain interacting protein kinase 2                                               | 1.5                         | 9.2E-02                             |
| 23 | Ccnj        | cyclin J                                                                               | 1.5                         | 3.3E-02                             |
| 24 | Stk35       | serine/threonine kinase 35                                                             | 1.5                         | 1.5E-02                             |
| 25 | Otud4       | OTU domain containing 4                                                                | 1.5                         | 3.0E-02                             |
| 26 | Slc7a2      | solute carrier family 7 (cationic amino acid transporter, y system), member 2          | 1.5                         | 2.5E-02                             |
| 27 | Mgat4a      | mannosyl (alpha-1,3-)-glycoprotein beta-1,4-N-acetylglucosaminyltransferase, isozyme A | 1.5                         | 4.6E-02                             |
| 28 | Prrc1       | proline-rich coiled-coil 1                                                             | 1.5                         | 1.0E-02                             |
| 29 | Skil        | SKI-like oncogene                                                                      | 1.5                         | 3.0E-03                             |
| 30 | Fam168b     | family with sequence similarity 168, member B                                          | 1.5                         | 2.7E-02                             |
| 31 | Trp53inp1   | transformation related protein 53 inducible nuclear protein 1                          | 1.5                         | 8.6E-02                             |

| #  | Gene symbol | Gene name                                                                               | Fold miR-499<br>TG-16 / ntg | miR-499<br>TG-16 vs<br>ntg, p-value |
|----|-------------|-----------------------------------------------------------------------------------------|-----------------------------|-------------------------------------|
| 32 | Ppp1r3b     | protein phosphatase 1, regulatory (inhibitor)<br>subunit 3B                             | 1.5                         | 5.0E-02                             |
| 33 | Hipk1       | homeodomain interacting protein kinase 1                                                | 1.5                         | 5.1E-02                             |
| 34 | Rbpj        | recombination signal binding protein for<br>immunoglobulin kappa J region               | 1.5                         | 2.7E-02                             |
| 35 | Cnot6       | CCR4-NOT transcription complex, subunit 6                                               | 1.4                         | 2.6E-02                             |
| 36 | Foxo1       | forkhead box O1                                                                         | 1.4                         | 3.1E-02                             |
| 37 | Lfng        | LFNG O-fucosylpeptide 3-beta-N-<br>acetylglucosaminyltransferase                        | 1.4                         | 4.0E-02                             |
| 38 | Mobk11a     | MOB1, Mps One Binder kinase activator-like 1A<br>(yeast)                                | 1.4                         | 5.1E-02                             |
| 39 | Zbtb39      | zinc finger and BTB domain containing 39                                                | 1.4                         | 2.5E-02                             |
| 40 | Fam116a     | family with sequence similarity 116, member A                                           | 1.4                         | 6.6E-02                             |
| 41 | Zbtb10      | zinc finger and BTB domain containing 10                                                | 1.4                         | 3.5E-02                             |
| 42 | Socs4       | suppressor of cytokine signaling 4                                                      | 1.4                         | 2.4E-02                             |
| 43 | Dicer1      | dicer 1, ribonuclease type III                                                          | 1.4                         | 2.2E-02                             |
| 44 | Pppde1      | PPPDE peptidase domain containing 1                                                     | 1.4                         | 1.6E-02                             |
| 45 | Blcap       | bladder cancer associated protein                                                       | 1.4                         | 3.6E-02                             |
| 46 | Arid2       | AT rich interactive domain 2 (ARID, RFX-like)                                           | 1.4                         | 2.7E-02                             |
| 47 | Sox6        | SRY (sex determining region Y)-box 6                                                    | 1.4                         | 2.3E-02                             |
| 48 | Tb11xr1     | transducin (beta)-like 1 X-linked receptor 1                                            | 1.4                         | 6.7E-02                             |
| 49 | Phip        | pleckstrin homology domain interacting protein                                          | 1.4                         | 8.1E-02                             |
| 50 | Bmpr2       | bone morphogenetic protein receptor, type II<br>(serine/threonine kinase)               | 1.4                         | 2.0E-02                             |
| 51 | Ugcg        | UDP-glucose ceramide glucosyltransferase                                                | 1.3                         | 1.3E-02                             |
| 52 | Lrrc58      | leucine rich repeat containing 58                                                       | 1.3                         | 2.5E-02                             |
| 53 | Ptplad1     | protein tyrosine phosphatase-like A domain<br>containing 1                              | 1.3                         | 1.3E-02                             |
| 54 | Bmp2k       | BMP2 inducible kinase                                                                   | 1.3                         | 8.5E-02                             |
| 55 | Prox1       | prospero homeobox 1                                                                     | 1.3                         | 4.1E-02                             |
| 56 | Mmd         | monocyte to macrophage differentiation-<br>associated                                   | 1.3                         | 6.7E-02                             |
| 57 | Slc25a37    | solute carrier family 25, member 37                                                     | 1.3                         | 4.5E-02                             |
| 58 | Rad54l2     | RAD54-like 2 ( <i>S. cerevisiae</i> )                                                   | 1.3                         | 4.0E-02                             |
| 59 | Cntn2       | contactin 2 (axonal)                                                                    | 1.3                         | 4.5E-02                             |
| 60 | Fam160b1    | family with sequence similarity 160, member B1                                          | 1.3                         | 2.1E-02                             |
| 61 | Jhdm1d      | jumonji C domain containing histone demethylase<br>1 homolog D ( <i>S. cerevisiae</i> ) | 1.3                         | 7.6E-02                             |
| 62 | Zfp280b     | zinc finger protein 280B                                                                | 1.3                         | 8.1E-02                             |
| 63 | Cmtm4       | CKLF-like MARVEL transmembrane domain<br>containing 4                                   | 1.3                         | 2.9E-02                             |
|    |             |                                                                                         |                             |                                     |

| #  | Gene symbol           | Gene name                                           | Fold miR-499<br>TG-16 / ntg | miR-499<br>TG-16 vs<br>ntg, p-value |
|----|-----------------------|-----------------------------------------------------|-----------------------------|-------------------------------------|
| 64 | <i>Rffl</i>           | ring finger and FYVE like domain containing protein | 5.3                         |                                     |
| 65 | <i>Med13 (Thrap1)</i> | mediator complex subunit 13                         | 3.2                         |                                     |
| 66 | <i>Fbxo3</i>          | F-box protein 3                                     | 3.1                         |                                     |
| 67 | <i>Gnao1</i>          | guanine nucleotide binding protein, alpha O         | 3.1                         |                                     |

**Online Table V.** *Direct cardiac targets of miR-499 identified by RISC-sequencing.* RISC enrichment (RISC RNA / transcriptome RNA) for miR-499 hearts. Threshold for RISC enrichment was 2-fold enrichment in nontransgenic hearts, and then a further  $\geq 1.25$ -fold in transgenic compared to nontransgenic,  $P < 0.05$ . 63 mRNAs were RISC-enriched in miR-499 hearts using these criteria. *Italicized entries:* 4 ‘newly-enriched’ RISC-targeted mRNAs included on the basis of  $\geq 3$ -fold enrichment in RISC RNA, but not transcriptome RNA, compared to nontransgenic hearts. # numbers refer to mRNA positions, from left to right, in **Figure 5a** and **5b**.

**Online Table VI: Expression levels of downregulated mRNAs directly targeted by miR-499.**

| Gene symbol | ntg<br>copies/cell | miR-499<br>copies/cell | Fold-change,<br>miR-499 vs ntg | p-value |
|-------------|--------------------|------------------------|--------------------------------|---------|
| Alg10b      | 4.6                | 3.8                    | -1.2                           | 6.7E-04 |
| Arid2       | 6.3                | 5.4                    | -1.2                           | 2.4E-02 |
| Cpne3       | 4.2                | 3.6                    | -1.2                           | 1.7E-03 |
| Dcp2        | 3.6                | 2.7                    | -1.3                           | 1.1E-02 |
| Ddi2        | 8.9                | 7.5                    | -1.2                           | 1.9E-03 |
| Dicer1      | 5.5                | 4.7                    | -1.2                           | 4.5E-03 |
| Fam116a     | 3.0                | 2.3                    | -1.3                           | 4.7E-04 |
| Foxo1       | 8.3                | 7.3                    | -1.1                           | 1.5E-04 |
| Hipk2       | 46.3               | 40.7                   | -1.1                           | 1.9E-03 |
| Jhdm1d      | 4.4                | 3.8                    | -1.2                           | 1.1E-02 |
| Lrrc58      | 11.3               | 8.6                    | -1.3                           | 7.5E-04 |
| Otud4       | 8.8                | 7.3                    | -1.2                           | 2.1E-04 |
| Rmnd5a      | 21.1               | 19.8                   | -1.1                           | 6.3E-03 |
| Sox6        | 3.1                | 2.5                    | -1.2                           | 4.6E-03 |
| Taok1       | 6.8                | 6.4                    | -1.1                           | 2.2E-02 |
| Uhmk1       | 4.6                | 3.9                    | -1.2                           | 5.2E-03 |

**Online Table VI.** *Expression levels of downregulated RNAs directly targeted by miR-499.* Sixteen of the 67 direct mRNA targets of miR-499 were significantly downregulated at the transcriptome level. mRNA content is shown as copies / cell in nontransgenic and miR-499 TG-16 transgenic hearts. mRNAs were classified as downregulated in response to miR-499 at P<0.025 compared to nontransgenic, fold-change  $\leq -1.1$ .

Online Table VII is supplied as an Excel workbook.

**Online Table VII.** *Pathway enrichment analysis of mRNAs regulated in response to miR-499 overexpression or pressure-overload.* MetaCore<sup>11</sup> was used to classify mRNAs regulated by at least 20%, FDR < 0.05 (P<0.005) into GeneGo proprietary pathway and process networks, as well as into Gene Ontology process categories.

Online Table VIII is supplied as an Excel workbook.

**Online Table VIII.** *Protein function enrichment of mRNAs regulated in response to miR-499 overexpression or pressure-overload.* mRNAs regulated by at least 20%, FDR < 0.05 (P<0.005) were subjected to MetaCore 11 protein functional enrichment analysis, separating mRNAs into classes of kinases, phosphatases, enzymes, transcription factors, proteases, ligands and receptors.

**Online Table IX. Regulation of kinase-coding mRNAs by miR-499 overexpression and by pressure overload.**

| Gene symbol        | Gene name                                                         | miR-499-specific regulation             |         | regulated by miR-499 and pressure-overload |         |
|--------------------|-------------------------------------------------------------------|-----------------------------------------|---------|--------------------------------------------|---------|
|                    |                                                                   | Signal (miR-499 TG-16 vs nontransgenic) | p-value | Signal (miR-499 TG-16 vs nontransgenic)    | p-value |
| <b>Upregulated</b> |                                                                   |                                         |         |                                            |         |
| Map3k6             | mitogen-activated protein kinase kinase kinase 6                  |                                         |         | 3.6                                        | 1.2E-04 |
| Pak3               | p21 protein (Cdc42/Rac)-activated kinase 3                        |                                         |         | 3.1                                        | 4.2E-04 |
| Map4k2             | mitogen-activated protein kinase kinase kinase kinase 2           | 2.6                                     | 4.8E-05 |                                            |         |
| Nuak1              | NUAK family, SNF1-like kinase, 1                                  |                                         |         | 2.5                                        | 1.1E-04 |
| Mylk4              | myosin light chain kinase family, member 4                        | 1.8                                     | 3.8E-03 |                                            |         |
| Sik1               | salt inducible kinase 1                                           |                                         |         | 1.8                                        | 4.9E-03 |
| Prkd1              | protein kinase D1                                                 |                                         |         | 1.7                                        | 3.0E-04 |
| Dapk1              | death associated protein kinase 1                                 | 1.6                                     | 2.6E-06 |                                            |         |
| Aak1               | AP2 associated kinase 1                                           | 1.5                                     | 7.6E-03 |                                            |         |
| Alpk2              | alpha-kinase 2                                                    |                                         |         | 1.5                                        | 7.4E-05 |
| Hipk1              | homeodomain interacting protein kinase 1                          | 1.5                                     | 4.9E-05 |                                            |         |
| Mknk2              | MAP kinase-interacting serine/threonine kinase 2                  | 1.5                                     | 1.3E-04 |                                            |         |
| Map2k3             | mitogen-activated protein kinase kinase 3                         | 1.5                                     | 1.5E-03 |                                            |         |
| Prkd2              | protein kinase D2                                                 | 1.4                                     | 1.6E-03 |                                            |         |
| Jak1               | Janus kinase 1                                                    | 1.4                                     | 6.6E-04 |                                            |         |
| Cdc42bpb           | CDC42 binding protein kinase beta                                 |                                         |         | 1.4                                        | 4.2E-04 |
| Dyrk1a             | dual-specificity tyrosine-(Y)-phosphorylation regulated kinase 1a | 1.4                                     | 7.5E-03 |                                            |         |

| Gene symbol          | Gene name                                                         | miR-499-specific regulation             |         | regulated by miR-499 and pressure-overload |         |
|----------------------|-------------------------------------------------------------------|-----------------------------------------|---------|--------------------------------------------|---------|
|                      |                                                                   | Signal (miR-499 TG-16 vs nontransgenic) | p-value | Signal (miR-499 TG-16 vs nontransgenic)    | p-value |
| Syk                  | spleen tyrosine kinase                                            | 1.4                                     | 2.2E-03 |                                            |         |
| Snrk                 | SNF related kinase                                                | 1.4                                     | 1.1E-04 |                                            |         |
| Fyn                  | Fyn proto-oncogene                                                | 1.4                                     | 4.1E-03 |                                            |         |
| Mink1                | misshapen-like kinase 1 (zebrafish)                               | 1.4                                     | 4.2E-03 |                                            |         |
| Mapk14               | mitogen-activated protein kinase 14 (p38 $\alpha$ )               | 1.4                                     | 6.9E-03 |                                            |         |
| Cdc42bpa             | CDC42 binding protein kinase alpha                                | 1.4                                     | 3.9E-04 |                                            |         |
| Map3k5               | mitogen-activated protein kinase kinase kinase 5                  | 1.4                                     | 3.9E-03 |                                            |         |
| Prkcd                | protein kinase C, delta                                           |                                         |         | 1.4                                        | 3.8E-03 |
| Sbk1                 | SH3-binding kinase 1                                              | 1.3                                     | 3.2E-03 |                                            |         |
| Map4k4               | mitogen-activated protein kinase kinase kinase kinase 4           | 1.3                                     | 1.6E-03 |                                            |         |
| Prkce                | protein kinase C, epsilon                                         | 1.3                                     | 1.3E-03 |                                            |         |
| Mylk                 | myosin, light polypeptide kinase                                  |                                         |         | 1.3                                        | 1.6E-03 |
| Dyrk1b               | dual-specificity tyrosine-(Y)-phosphorylation regulated kinase 1b | 1.3                                     | 6.1E-03 |                                            |         |
| Rps6kb2              | ribosomal protein S6 kinase, polypeptide 2                        | 1.3                                     | 5.6E-03 |                                            |         |
| Mark4                | MAP/microtubule affinity-regulating kinase 4                      | 1.3                                     | 5.1E-04 |                                            |         |
| Clk2                 | CDC-like kinase 2                                                 | 1.2                                     | 5.0E-03 |                                            |         |
| <b>Downregulated</b> |                                                                   |                                         |         |                                            |         |
| Akt1                 | thymoma viral proto-oncogene 1                                    | -1.3                                    | 6.4E-03 |                                            |         |
| Camk1                | calcium/calmodulin-dependent protein kinase I                     | -1.4                                    | 4.4E-03 |                                            |         |

| Gene symbol                                       | Gene name                                                                    | miR-499-specific regulation             |         | regulated by miR-499 and pressure-overload |         |
|---------------------------------------------------|------------------------------------------------------------------------------|-----------------------------------------|---------|--------------------------------------------|---------|
|                                                   |                                                                              | Signal (miR-499 TG-16 vs nontransgenic) | p-value | Signal (miR-499 TG-16 vs nontransgenic)    | p-value |
| Camk2d                                            | calcium/calmodulin-dependent protein kinase II, delta                        | -1.4                                    | 4.4E-03 |                                            |         |
| Nme2                                              | non-metastatic cells 2, protein (NM23B) expressed in                         | -1.4                                    | 1.1E-03 |                                            |         |
| Mapkapk5                                          | MAP kinase-activated protein kinase 5                                        | -1.7                                    | 3.2E-04 |                                            |         |
| Phkg1                                             | phosphorylase kinase gamma 1                                                 |                                         |         | -2.3                                       | 1.6E-04 |
| <b>Other Akt-related kinases and phosphatases</b> |                                                                              |                                         |         |                                            |         |
| Pik3c2b                                           | phosphoinositide-3-kinase, class 2, beta polypeptide                         | 1.1                                     | 3.5E-01 |                                            |         |
| Pik3r1                                            | phosphatidylinositol 3-kinase, regulatory subunit, polypeptide 1 (p85 alpha) | 1.4                                     | 9.2E-06 |                                            |         |
| Pik3r2                                            | phosphatidylinositol 3-kinase, regulatory subunit, polypeptide 2 (p85 beta)  | 1.2                                     | 2.8E-01 |                                            |         |
| Pdpk1                                             | 3-phosphoinositide dependent protein kinase 1                                | 1.2                                     | 1.4E-01 |                                            |         |
| Pten                                              | phosphatase and tensin homolog                                               | 1.2                                     | 9.3E-03 |                                            |         |
| Ppp2ca                                            | protein phosphatase 2 (formerly 2A), catalytic subunit, alpha isoform        | 1.1                                     | 3.1E-01 |                                            |         |
| Ppp2cb                                            | protein phosphatase 2 (formerly 2A), catalytic subunit, beta isoform         |                                         |         | 1.2                                        | 6.7E-02 |
| Phlpp1                                            | PH domain and leucine rich repeat protein phosphatase 1                      | 1.2                                     | 6.0E-02 |                                            |         |



**Online Table IX. Regulation of kinase-coding mRNAs by miR-499 overexpression and by pressure overload.** Upregulated and downregulated kinase mRNAs were defined at a 20% fold-change, FDR<0.05 (P<0.005). While not all of the Akt-related kinases and phosphatases meet these criteria, they are shown for illustrative purposes.

**Online Table X: Identification and regulation of proteins in miR-499 transgenic hearts.**

| Spot # | TG 1/ Ntg 1 | TG 2/ Ntg 2 | TG 3 / Ntg 3 | TG 4 / Ntg 4 | TG 5 / Ntg 5 | Regulation? | Gene symbol   |
|--------|-------------|-------------|--------------|--------------|--------------|-------------|---------------|
| 1      | -1.1        | -1.1        | 1.05         | -1.22        | -1.26        |             | Mybpc3        |
| 2      | 1.44        | 2.05        | -1.27        | 1.2          | 1.25         | up          | Mybpc3        |
| 3      | -1.36       | -2.59       | -1.29        | -1.42        | -1.41        | down        | Serpina3k     |
| 4      | -1.36       | 1.03        | 1.08         | -1.37        | -1.05        |             | Hspa8         |
| 5      | -1.22       | 1.52        | 1.06         | -1.07        | 1.02         |             | Anxa6         |
| 6      | -1.17       | -1.3        | -1.26        | -1.22        | -1.22        | down        | Acss1         |
| 7      | 1.69        | 1.55        | 2.28         | 2.04         | 2.11         | up          | Ehd4          |
| 8      | 1.02        | 1.14        | 1.4          | 1.31         | 1.36         |             | Acadv1        |
| 11     | -1.16       | -1.34       | 1.14         | -2.82        | -2.49        | down        | P4hb          |
| 12     | -1.03       | -1.4        | 1.02         | -1.85        | -1.76        | down        | P4hb          |
| 13     | -1.04       | -1.27       | -1.25        | -1.28        | -1.25        | down        | Fgb           |
| 14     | -1.38       | -2.26       | -1.17        | -1.35        | -1.41        | down        | Aldh4a1       |
| 16     | -1.41       | -1.17       | -1.08        | -1.59        | -1.48        | down        | Atp5a1        |
| 17     | 1.02        | -2.02       | -1.46        | 1.22         | 1.17         |             | Vim           |
| 18     | -1.26       | -1.29       | -1.16        | -1.43        | -1.18        | down        | Oat           |
| 19     | -1.12       | -1.13       | -1.19        | -1.08        | -1.09        |             | Srl           |
| 20     | -1.64       | -1.82       | -1.26        | -1.46        | -1.43        | down        | Pdha1         |
| 21     | -1.42       | -1.44       | -1.09        | -1.35        | -1.28        | down        | Eno3          |
| 22     | -1.54       | -1.73       | -1.43        | -1.81        | -1.58        | down        | Ckmt2         |
| 23     | -1.44       | -1.46       | -1.14        | -1.53        | -1.51        | down        | Ckmt2         |
| 24     | -1.29       | -1.21       | -1.57        | -1.48        | -1.54        | down        | Eca40 (Bcat2) |
| 25     | -1.57       | -1.37       | -1.01        | -1.4         | -1.4         | down        | Mdh2          |
| 26     | -1.41       | -1.26       | -1.06        | -1.27        | -1.45        | down        | Ldhb          |
| 27     | -1.64       | -1.25       | -1.12        | -1.27        | 1            | down        | Mdh1          |
| 28     | -1.45       | -1.29       | -1.1         | -1.38        | -1.1         | down        | Mdh1          |
| 29     | -1.33       | -1.2        | -1.19        | -1.6         | -1.33        | down        | Ech1          |
| 31     | -1.66       | -1.44       | 1.03         | -1.35        | -1.26        | down        | Ldha          |
| 32     | -2.12       | -2.66       | -1.39        | -1.28        | -1.29        | down        | Myoz2         |
| 34     | 1.03        | 2.53        | 1.14         | -1.02        | -1.08        |             | Vdac2         |
| 35     | -1.23       | -1.32       | -1.04        | -1.24        | 1.03         | down        | Tnni3         |
| 36     | 1.04        | 1.1         | 1.15         | 1.15         | 1.18         | up          | Ywhag         |
| 41     | -1.84       | -1.4        | -1.45        | -1.23        | -1.24        | down        | Gstm2         |
| 43     | -1.66       | 1.01        | -1.36        | -1.74        | -1.63        | down        | Mb            |
| 44     | 3.22        | -1.03       | 2.16         | 3.24         | 3.7          | up          | Ndufaf2       |
| 45     | 7.43        | 5.44        | 3.85         | 10.08        | 5.43         | up          | Gm9234        |
| 48     | -1.14       | 2.08        | 1.06         | 1.79         | 1.04         |             | Cox5a         |
| 54     | 1.26        | 1.25        | 1.02         | -1.14        | 1.11         |             | Hspb7         |
| 55     | 1.72        | 1.11        | -1.22        | -1.2         | -1.23        | down        | Pdha1         |
| 56     | 1.22        | 1.17        | 1.67         | 1.49         | 1.43         | up          | Sdha          |
| 57     | 1.18        | 1.19        | 1.45         | -1.09        | 1            | up          | uk (unknown)  |
| 58     | -1.25       | -1.21       | 1.05         | -1.03        | -1.1         | down        | Eno1          |
| 60     | 1.2         | 1.29        | 1.16         | 1.23         | 1.29         | up          | Adprh1        |
| 62     | -1.01       | 1.67        | -1.73        | -1.31        | -1.31        | down        | Myl4          |
| 64     | -1.79       | 1.39        | -2.07        | -1.11        | -1.14        |             | Myl7          |
| 66     | -1.05       | -1.37       | 1.28         | -1.2         | -1.18        | down        | Trf           |

| Spot # | TG 1/<br>Ntg 1 | TG 2/<br>Ntg 2 | TG 3 /<br>Ntg 3 | TG 4/<br>Ntg 4 | TG 5 /<br>Ntg 5 | Regulation? | Gene symbol |
|--------|----------------|----------------|-----------------|----------------|-----------------|-------------|-------------|
| 67     | -1.28          | -1.36          | 1.36            | 1.11           | 1.34            |             | Hspb8       |
| 68     | -1.14          | -1.33          | 1.39            | 1.31           | 1.35            | up          | Hspb9       |

**Online Table X.** *Identification and regulation of proteins in miR-499 transgenic hearts.* Multiple spots were manually matched across 5 2D DiGE gels, representing 5 different nontransgenic and miR-499 transgenic hearts. 31 were identified using mass spectroscopy, while a further 15 were identified by comparison to previously published proteomic maps. Density ratios between miR-499 transgenic and nontransgenic hearts are shown for each protein. Proteins were classified as up- or downregulated if changes of at least 20% in the same direction were identified on at least 3 of 5 gels.

**Online Table XI: Identification and regulation of proteins in nontransgenic and miR-499 transgenic hearts subjected to TAC.**

| Spot# | ntg            |                |                |                |                |             | miR-499 TG     |                |                |                |                |             | Gene symbol |
|-------|----------------|----------------|----------------|----------------|----------------|-------------|----------------|----------------|----------------|----------------|----------------|-------------|-------------|
|       | TAC 1 / sham 1 | TAC 2 / sham 2 | TAC 3 / sham 3 | TAC 4 / sham 4 | TAC 5 / sham 5 | Regulation? | TAC 1 / sham 1 | TAC 2 / sham 2 | TAC 3 / sham 3 | TAC 4 / sham 4 | TAC 5 / sham 5 | Regulation? |             |
| 1     |                | -1.65          | -1.42          | 1.45           |                |             | -1.39          | -1.29          |                | -1.38          | -1.54          | down        | Mybpc3      |
| 2     | 1.44           | 2.14           | 2.06           | -2.86          | -2.58          | up          | 2.06           | 1.42           | 1.18           | -1.07          | -1.04          | up          | Mybpc3      |
| 3     | 1.06           | 1.87           | 2.43           | 3.13           |                | up          | -1.68          | -1.04          | 2.22           |                | 2.62           |             | Serpina3k   |
| 4     | 1.15           | 1.23           | 1.15           | 1.86           | 1.28           | up          | -1.18          | -1.12          | 1.31           |                | 1.55           |             | Hspa8       |
| 5     | -1.15          | -1.87          | -1.62          | 1.09           | -1.31          | down        | -1.74          | 1.05           | -1.28          | 1.11           | 1.15           |             | Anxa6       |
| 6     | 1.02           | -1.06          | 1.19           | 1.08           | 1.04           |             | 1.07           | 1.06           | -1.19          | 1.12           | 1.03           |             | Acss1       |
| 7     | -1.04          | -1.03          | -1.48          | 1.12           | -1.08          |             | -1.02          | -1.63          | 1.52           | 2.07           | 2.28           | up          | Ehd4        |
| 8     | -1.56          | -1.22          | -1.05          | -1             | 1.03           |             | -1.04          | -1.28          | 1.04           | 1.52           | 1.38           |             | Acadvl      |
| 11    | 1.03           | 1.48           | 2.01           | 3.67           |                | up          | 1.06           | -1.31          | 3.11           | 2.18           |                |             | Pd4b        |
| 12    | 1.04           | 1.3            | 2.56           | 3.32           | 2.81           | up          | 1.13           | -1.57          | 2.51           | 2.34           | 2.41           | up          | Pd4b        |
| 13    | -1.14          | 1.17           | 1.95           | 1.51           | 1.57           | up          | -1.53          | -1.86          | 1.24           | 1.28           | 1.38           | up          | Fgb         |
| 14    | 1.51           | 1.94           | 2.03           | 2.03           | 1.48           | up          | -1.11          | -1.24          | 1.38           | 1.29           | 1.37           | up          | Aldh4a1     |
| 16    | 1.24           | 1.16           | -1.02          | 1.04           | 1              |             | 1.02           | 1.11           | 1.12           | -1.15          | -1.15          |             | Atp5a1      |
| 17    | -1.47          | 1.26           |                | 1.18           | 1.46           | up          | 1              | -4.02          |                | 1.09           | -1.18          |             | Vim         |
| 18    | 1.52           | 1.36           | -1.01          | 1.11           | 1.3            |             | -1.17          | 1.09           | 1.06           | 1.13           | 1.06           |             | Oat         |
| 19    | 1.06           | -1.07          | 1.2            | 1.16           | 1.04           |             | 1.24           | 1.09           | -1.13          | 1.1            | 1.13           |             | Srl         |
| 20    | 2.38           | 2.76           | -1.35          | 1.97           | 2.08           | up          | 1.21           | 4.48           | 3.54           | 1.91           | 1.68           | up          | Pdha1       |
| 21    | 1.55           | 1.2            | 1.26           | 1.42           | 1.17           | up          | 1.15           | 1.17           | 1.42           | 1.27           | 1.26           | up          | Eno3        |
| 22    | -1.09          | -1.11          | 1.14           | 1.18           | 1.03           |             | 1.07           | 1.29           | 1.19           | -1.44          | -1.26          |             | Ckmt2       |
| 23    | 1.33           | 1.21           | 1.07           | 1.16           | 1.05           | up          | 1.03           | 1.35           | 1.05           | -1.15          | -1.25          |             | Ckmt2       |
| 24    | -1.08          | -1.01          | -1.24          | -1.03          | -1.25          |             | 1.05           | 1.05           | -1.3           | -1.14          | -1.2           |             | Eca40       |
| 25    | 1.47           | 1.23           | 1.13           | 1.39           | 1.25           | up          | 1.06           | -1             | 1.39           | 1.18           | 1.13           |             | Mdh2        |
| 26    | 1.35           | 1.15           | 1.24           | 1.34           | 1.12           |             | 1.01           | 1.12           | 1.35           | 1.03           | 1.14           |             | Ldhb        |
| 27    | 1.56           | 1.05           | 1.14           | 1.11           | 1.21           | up          | -1.06          | 1.03           | -1.02          | 1.2            | 1.32           |             | Mdh1        |
| 28    | 1.43           | 1.11           | 1.04           | 1.18           | 1.15           |             | -1.05          | 1.14           | 1.03           | 1.09           | 1.12           |             | Mdh1        |

| Spot# | ntg            |                |                |                |                |             | miR-499 TG     |                |                |                |                |             | Gene symbol |
|-------|----------------|----------------|----------------|----------------|----------------|-------------|----------------|----------------|----------------|----------------|----------------|-------------|-------------|
|       | TAC 1 / sham 1 | TAC 2 / sham 2 | TAC 3 / sham 3 | TAC 4 / sham 4 | TAC 5 / sham 5 | Regulation? | TAC 1 / sham 1 | TAC 2 / sham 2 | TAC 3 / sham 3 | TAC 4 / sham 4 | TAC 5 / sham 5 | Regulation? |             |
| 29    | 1.28           | 1.35           | 1.04           | 1.09           | 1.09           |             | 1.09           | 1.43           | -1.07          | -1.45          | -1.57          |             | Ech1        |
| 31    | 1.33           | 1.29           | 1.18           | 1.39           | 1.18           | up          | -1.03          | -1.1           | 1.64           | 1.44           | 1.76           | up          | Ldha        |
| 32    | 1.06           | 2.01           | -1.04          | 1.1            | 1.74           |             | 1.22           | -1.11          | 1.87           | 1.93           | 2.01           | up          | Myoz2       |
| 34    | -2.82          | -3.12          | -2.28          | -3.24          | -2.49          | down        | -1.78          | 1.3            | -2.34          | -1.68          | -1.74          | down        | Vdac2       |
| 35    | -1.01          | 1.02           |                | -1.22          |                |             | -1.19          | 1.12           | 1.05           |                | 1.05           |             | Tnni3       |
| 36    | -1.31          | -1.02          | -1.2           | -1.17          | 1.09           | down        | -1.26          | -1.05          |                | 1.1            |                |             | Ywhag       |
| 41    | 1.05           | -1.08          | 1.07           | 1.14           | 1.19           |             | 1.06           | -1.05          | -1.21          | 1.31           | 1.08           |             | Gstm2       |
| 43    | 1.16           | 1.51           | 1.91           | 3.16           | 3.49           | up          | 2.41           | -1.34          | 1.34           | 2.49           |                | up          | Mb          |
| 44    | -1.38          | -1.32          | -2.17          | -2.06          | -2.62          | down        | -1.32          | -2.5           |                |                |                |             | Ndufaf2     |
| 45    | 1.62           | -2.89          | -1.4           | 1.23           | -3.88          | down        | 2.82           | -3.14          | -1.05          | 1.32           | 1.23           | up          | Gm9234      |
| 48    | 1.07           | -1.2           | -1.47          | -1.51          | -2.19          | down        | -1.03          | 1.19           | -1.29          | -1.36          | -1.05          | down        | Cox5a       |
| 54    | 1.15           | 1.08           | -2.35          | -2.55          | -2.35          | down        | -1.2           | 1.05           | -1.38          | -2.17          | -2.34          | down        | Hspb7       |
| 55    | -2.19          | -1.97          | -1.14          | -1.48          | -1.22          | down        | 1.19           | -1.51          | -2             | -1.67          | -1.68          | down        | Pdha1       |
| 56    |                |                |                |                |                |             |                |                |                |                |                |             | Sdha        |
| 58    |                |                |                |                |                |             |                |                |                |                |                |             | Eno1        |
| 60    |                |                |                |                |                |             |                |                |                |                |                |             | Adprh1      |
| 62    | 1.08           | -1.22          | 3.1            | 6.59           | 6.77           | up          | -1.28          | -1.79          | 1.21           | 7.39           | 8.16           | up          | Myl4        |
| 64    | 1.27           | -1.05          | 2.26           | 8.99           |                | up          | -2.01          | -2.71          | 1.08           | 26.57          | 35.28          |             | Myl7        |
| 66    | 1.36           | 1.41           | 1.62           | 2.45           | 2.52           | up          | -1.19          | -1.37          | 1.94           | 2.52           | 2.55           | up          | Trf         |
| 67    | 1.51           | 1.96           | 1.9            | 2.69           | 2.64           | up          | 1.12           | -1.37          | 2.17           | 3.12           | 3.59           | up          | Hspb8       |
| 68    | 1.53           | 1.69           | 1.61           | 2.34           | 2.71           | up          | 1.16           | -1.23          | 1.83           | 3.27           | 3.54           | up          | Hspb9       |

**Online Table XI.** Identification and regulation of proteins in nontransgenic and miR-499 transgenic hearts subjected to 1 week of pressure overload. Multiple spots were manually matched across 2D DiGE gels, representing 10 different nontransgenic hearts (5 sham, 5 TAC) and 10 different miR-499 transgenic hearts (5 sham, 5 TAC). One sham and one TAC heart were loaded on each gel. 31 spots were identified using mass spectroscopy, while a further 15 were identified by comparison to previously published proteomic maps. In-gel density ratios between TAC and sham treatments are shown. Proteins were classified as up- or downregulated if changes of at least 20% in the same direction were identified on at least 3 of 5 gels.

**Online Table XII. Quantitation of mRNA, total protein and phosphoprotein for differentially phosphorylated proteins.**

| mRNA or protein        | Fold-change (499TG-sham vs. ntg-sham) | p-value      | Fold-change (ntg-TAC vs. ntg-sham) | p-value        | Fold-change (499TG-TAC vs. 499TG-sham) | p-value      | ntg-sham (copies/cell or protein density) | ntg-TAC (copies/cell or protein density) | 499TG-sham (copies/cell or protein density) | 499TG-TAC (copies/cell or protein density) |
|------------------------|---------------------------------------|--------------|------------------------------------|----------------|----------------------------------------|--------------|-------------------------------------------|------------------------------------------|---------------------------------------------|--------------------------------------------|
| <i>Hsp90aa1</i>        | 1.1                                   | 0.32         | <b>1.5</b>                         | <b>3.3E-03</b> | 1.1                                    | 0.33         | 52                                        | 75                                       | 58                                          | 64                                         |
| <i>Hsp90ab1</i>        | 1.0                                   | 0.53         | 1.1                                | 0.32           | 1.0                                    | 0.85         | 478                                       | 507                                      | 496                                         | 502                                        |
| Phospho Hsp90β, spot 1 | 1.5                                   | >0.05        | -1.5                               | >0.05          | -2.2                                   | >0.05        | 3.9                                       | 2.6                                      | 5.8                                         | 2.6                                        |
| Phospho Hsp90β, spot 2 | <b>3.2</b>                            | <b>0.01</b>  | 1.2                                | >0.05          | <b>-2.9</b>                            | <b>0.01</b>  | 0.75                                      | 0.92                                     | <b>2.4</b>                                  | 0.80                                       |
| Total Hsp90β           | 1.1                                   | >0.05        | 1.1                                | 0.22           | 1.1                                    | 0.36         |                                           |                                          |                                             |                                            |
| <i>Ppp1ca</i>          | -1.1                                  | 0.03         | -1.1                               | 0.27           | -1.03                                  | 0.59         | 60                                        | 57                                       | 53                                          | 52                                         |
| Phospho-PP1α           | NaN                                   | NaN          | <b>-2.5</b>                        | <b>0.006</b>   | <b>3.7</b>                             | <b>0.01</b>  | 0.16                                      | 0.065                                    | 0                                           | <b>0.24</b>                                |
| Total PP1α             | Spot not measurable                   |              |                                    |                |                                        |              |                                           |                                          |                                             |                                            |
| <i>Pgm2</i>            | 1.1                                   | 0.13         | 1.0                                | 0.89           | -1.1                                   | 0.34         | 34                                        | 34                                       | 37                                          | 35                                         |
| Phospho                | -1.2                                  | >0.05        | <b>-1.6</b>                        | <b>0.017</b>   | 1.1                                    | >0.05        | 0.56                                      | <b>0.34</b>                              | 0.48                                        | 0.53                                       |
| Total Pgm2             | Spot not measurable                   |              |                                    |                |                                        |              |                                           |                                          |                                             |                                            |
| <i>Ndufa10</i>         | -1.1                                  | 0.1          | -1.2                               | 0.014          | -1.1                                   | 0.12         | 133                                       | 113                                      | 120                                         | 109                                        |
| Phospho                | <b>2.3</b>                            | <b>0.004</b> | 1.3                                | 0.28           | <b>2.9</b>                             | <b>0.003</b> | 0.08                                      | 0.10                                     | 0.18                                        | 0.30                                       |
| Total Ndufa10          | Spot not measurable                   |              |                                    |                |                                        |              |                                           |                                          |                                             |                                            |
| <i>Gpd1</i>            | 1.1                                   | 0.57         | -1.2                               | 0.27           | -1.1                                   | 0.56         | 17                                        | 15                                       | 19                                          | 17                                         |
| Phospho                | <b>7.0</b>                            | <b>0.002</b> | <b>7.7</b>                         | <b>0.02</b>    | -2.4                                   | 0.18         | 0.07                                      | 0.52                                     | 0.47                                        | 0.22                                       |
| Total Gpd1             | Spot not measurable                   |              |                                    |                |                                        |              |                                           |                                          |                                             |                                            |
| <i>Ehd2</i>            | 1.3                                   | 0.11         | 1.3                                | 0.08           | -1.03                                  | 0.86         | 30                                        | 39                                       | 40                                          | 39                                         |
| Phospho                | 1.2                                   | >0.05        | -1.5                               | >0.05          | 1.1                                    | >0.05        | 0.36                                      | 0.25                                     | 0.43                                        | 0.47                                       |
| Total Ehd2             | Spot not measurable                   |              |                                    |                |                                        |              |                                           |                                          |                                             |                                            |

**Online Table XII.** Quantitation of mRNA, total protein and phosphoprotein for differentially phosphorylated proteins. mRNA levels are expressed in copies/cell. Protein density is spot signal relative to internal phosphoprotein standard (**Online Figure V**). Phospho-protein refers to

signal intensity from ProQ-Diamond phosphoprotein staining; total protein is measured from Cy5 dye-labeling of 150 µg ventricular homogenate. The mRNA *Hsp90aa1* corresponds to the Hsp90α protein (not measured in proteomic studies) while *Hsp90ab1* corresponds to the Hsp90β protein. Other regulated phosphoproteins detected by mass spectrometry were *Ppp1ca* (PP1α), *Pgm2* (phosphoglucomutase-2), *Ndufa10* (NADH dehydrogenase (ubiquinone) 1 alpha subcomplex 10), and *Gpd1* (glycerol-3-phosphate dehydrogenase 1); *Ehd2* (EH domain-containing 2) represents an unregulated phosphoprotein. Bold text denotes significant changes. NaN, not a number (division by zero). Total protein was not measurable for several proteins due to higher sensitivity of phosphoprotein staining compared to Cy5 dye-labeling.

**Online Table XIII: Comparison of previously reported *in vivo* miR-499 targets with transcriptome regulation in the current study.**

| Transcriptomes                    | Reported regulation                    | Fold-change (miR-499 TG-16 vs ntg, 4 wk) | p-value | Fold-change (miR-499 TG-53 vs ntg, 4 wk) | p-value | Fold-change (miR-499 TG-16 vs ntg, 8 wk) | p-value | Copies/cell (ntg, 4 wk) | Copies/cell (ntg, 8 wk) |
|-----------------------------------|----------------------------------------|------------------------------------------|---------|------------------------------------------|---------|------------------------------------------|---------|-------------------------|-------------------------|
| <b>Nat Med 2011<sup>12</sup></b>  |                                        |                                          |         |                                          |         |                                          |         |                         |                         |
| Ppp3ca                            | miR-499 target                         | 1.1                                      | 0.26    | 1.2                                      | 0.12    | 1.5                                      | 1.9E-03 | 10.5                    | 6.0                     |
| Ppp3cb                            | miR-499 target                         | -1.1                                     | 0.58    | -1.3                                     | 0.01    | -1.1                                     | 0.39    | 3.9                     | 1.9                     |
| Dnm11                             | Phosphorylation status via calcineurin | -1.1                                     | 0.03    | -1.3                                     | 4.4E-04 | 1.0                                      | 0.95    | 4.8                     | 3.3                     |
| <b>PLoS One 2011<sup>13</sup></b> |                                        |                                          |         |                                          |         |                                          |         |                         |                         |
| Pah *                             | 2.5                                    | 11.1                                     | 1.4E-05 | 12.3                                     | 1.6E-06 | 6.3                                      | 2.9E-03 | 0.6                     | 1.1                     |
| Nppb                              | 2.0                                    | 1.2                                      | 0.37    | 1.6                                      | 2.6E-03 | 1.1                                      | 0.77    | 143.3                   | 38.5                    |
| Olfr872                           | 1.9                                    |                                          |         |                                          |         |                                          |         | zero FPKM, all samples  |                         |
| Ppargc1a                          | 1.9                                    | -1.9                                     | 2.7E-05 | -1.8                                     | 4.0E-05 | 1.6                                      | 0.03    | 24.5                    | 7.7                     |
| Alcam                             | 1.9                                    |                                          |         |                                          |         |                                          |         | zero FPKM or FPKM<1     |                         |
| Myh7 *                            | 1.9                                    | 1.1                                      | 0.03    | 1.2                                      | 2.9E-05 | 2.5                                      | 0.02    | 475.8                   | 359.5                   |
| Gck *                             | 1.8                                    | 2.2                                      | 2.3E-07 | 4.2                                      | 1.8E-15 | 2.9                                      | 1.4E-03 | 5.0                     | 3.8                     |
| Acta1 *                           | 1.6                                    | 2.6                                      | 1.7E-04 | 4.0                                      | 1.5E-08 | 2.4                                      | 0.01    | 165.8                   | 191.4                   |
| Rnf144b                           | 1.6                                    | -1.2                                     | 0.10    | 1.1                                      | 0.41    | 2.7                                      | 5.1E-03 | 3.8                     | 1.2                     |
| Egr1                              | -2.5                                   | -1.0                                     | 0.96    | 1.5                                      | 0.02    | 1.7                                      | 0.59    | 2.5                     | 5.2                     |
| Fos                               | -1.9                                   | 1.1                                      | 0.92    | 2.0                                      | 0.04    | 1.9                                      | 0.44    | 0.8                     | 1.6                     |



| Transcriptomes | Reported regulation | Fold-change (miR-499 TG-16 vs ntg, 4 wk) | p-value | Fold-change (miR-499 TG-53 vs ntg, 4 wk) | p-value | Fold-change (miR-499 TG-16 vs ntg, 8 wk) | p-value | Copies/cell (ntg, 4 wk) | Copies/cell (ntg, 8 wk) |
|----------------|---------------------|------------------------------------------|---------|------------------------------------------|---------|------------------------------------------|---------|-------------------------|-------------------------|
| Egr2           | -1.6                |                                          |         |                                          |         |                                          |         | zero FPKM or FPKM<1     |                         |
| Ly75           | -1.6                |                                          |         |                                          |         |                                          |         | zero FPKM or FPKM<1     |                         |
| Myl4           | -1.6                |                                          |         |                                          |         |                                          |         | zero FPKM or FPKM<3     |                         |
| Myl7           | -1.6                |                                          |         |                                          |         |                                          |         | zero FPKM, all samples  |                         |
| Pfkfb1 *       | -1.5                | 1.3                                      | 0.43    | -4.3                                     | 0.04    | -2.1                                     | 9.2E-03 | 2.0                     | 2.1                     |
| Flvcr2         | -1.5                |                                          |         |                                          |         |                                          |         | zero FPKM or FPKM<1     |                         |
| Wif1           | -1.5                |                                          |         |                                          |         |                                          |         | zero FPKM or FPKM<3     |                         |
| Cysltr2        | -1.5                |                                          |         |                                          |         |                                          |         | zero FPKM, all samples  |                         |

\* designates P<0.05 regulation in the same direction, as in previous studies, in at least 2 of 3 cohorts from the current RNA-sequencing data.

**Online Table XIII.** Comparison of previously reported *in vivo* miR-499 targets with transcriptome regulation in the current study. Of the three miR-499 targets *Ppp3ca* and *Ppp3cb* (CnA $\alpha$  and  $\beta$  subunits) and *Dnm1l* (dynamin-like protein 1) reported by Wang et al.<sup>12</sup>, only *Dnm1l* was downregulated at the transcriptome level in both miR-499 TG-16 and TG-53 transgenic mice in our studies. *Ppp3cb* was downregulated only in the higher-expressing miR-499 transgenic line. While 19 mRNAs were reported by Shieh et al.<sup>13</sup> to be up- or down-regulated in miR-499 wild-type transgenic mice using microarray technology, RNA sequencing was unable to detect 9 of these (FPKM of 0, or <3). Similar regulation in RNA sequencing studies was observed for 5 of the 19 mRNAs.

**Online Table XIV: Comparison of previously reported *in vivo* miR-499 targets with RISCome regulation in the current study.**

| <b>RISComes</b>                   | <b>Fold-change</b><br>(miR-499<br>TG-16 vs<br>ntg) | <b>p-value</b><br>(miR-499<br>TG-16 vs<br>ntg) | <b>Fold-change</b><br>(miR-499 TG-<br>53 vs ntg) | <b>p-value</b><br>(miR-499<br>TG-53 vs<br>ntg) | <b>Mean</b><br><b>FPKM</b><br>(ntg) | <b>Mean</b><br><b>FPKM</b><br>(miR-499<br>TG-16) | <b>Mean</b><br><b>FPKM</b><br>(miR-499<br>TG-53) |
|-----------------------------------|----------------------------------------------------|------------------------------------------------|--------------------------------------------------|------------------------------------------------|-------------------------------------|--------------------------------------------------|--------------------------------------------------|
| <b>Nat Med 2011<sup>12</sup></b>  |                                                    |                                                |                                                  |                                                |                                     |                                                  |                                                  |
| Ppp3ca                            | -1.7                                               | 0.12                                           | 1.1                                              | 0.66                                           | 82                                  | 49                                               | 90                                               |
| Ppp3cb                            | -1.0                                               | 0.99                                           | 1.1                                              | 0.74                                           | 41                                  | 41                                               | 44                                               |
| Dnm11                             | -1.3                                               | 0.20                                           | -1.1                                             | 0.62                                           | 50                                  | 39                                               | 46                                               |
| <b>PLoS One 2011<sup>13</sup></b> |                                                    |                                                |                                                  |                                                |                                     |                                                  |                                                  |
| Pah (up in transcriptome)         |                                                    |                                                |                                                  |                                                | 0                                   | 21                                               | 28                                               |
| Nppb (up in transcriptome)        | -1.2                                               | 0.61                                           | 1.9                                              | 2.5E-03                                        | 577                                 | 490                                              | 1117                                             |
| Olfr872 (up in transcriptome)     |                                                    |                                                |                                                  |                                                | zero FPKM, all samples              |                                                  |                                                  |
| Ppargc1a (up in transcriptome)    | -1.6                                               | 0.06                                           | -1.6                                             | 0.04                                           | 244                                 | 148                                              | 150                                              |
| Alcam (up in transcriptome)       |                                                    |                                                |                                                  |                                                | zero FPKM, all samples              |                                                  |                                                  |
| Myh7 (up in transcriptome)        | 1.0                                                | 0.83                                           | 1.0                                              | 0.98                                           | 3531                                | 3632                                             | 3540                                             |
| Gck (up in transcriptome)         | 2.2                                                | 0.03                                           | 4.1                                              | 4.4E-06                                        | 33                                  | 72                                               | 137                                              |
| Acta1 (up in transcriptome)       | 2.3                                                | 0.01                                           | 3.4                                              | 8.5E-06                                        | 574                                 | 1300                                             | 1978                                             |
| Rnf144b (up in transcriptome)     | -1.1                                               | 0.63                                           | 1.1                                              | 0.72                                           | 51                                  | 45                                               | 55                                               |
| Egr1 (down in transcriptome)      | -1.0                                               | 0.93                                           | 1.4                                              | 0.11                                           | 62                                  | 60                                               | 86                                               |
| Fos (down in transcriptome)       |                                                    |                                                |                                                  |                                                | detected in 3 hearts only           |                                                  |                                                  |
| Egr2 (down in transcriptome)      |                                                    |                                                |                                                  |                                                | detected in 2 hearts only           |                                                  |                                                  |
| Ly75 (down in transcriptome)      |                                                    |                                                |                                                  |                                                | zero FPKM, all samples              |                                                  |                                                  |
| Myl4 (down in transcriptome)      | -2.3                                               | 0.56                                           | 1.7                                              | 0.41                                           | 265                                 | 116                                              | 456                                              |

| <b>RISComes</b>                 | <b>Fold-change</b><br>(miR-499<br>TG-16 vs<br>ntg) | <b>p-value</b><br>(miR-499<br>TG-16 vs<br>ntg) | <b>Fold-change</b><br>(miR-499 TG-<br>53 vs ntg) | <b>p-value</b><br>(miR-499<br>TG-53 vs<br>ntg) | <b>Mean<br/>FPKM</b><br>(ntg) | <b>Mean<br/>FPKM</b><br>(miR-499<br>TG-16) | <b>Mean<br/>FPKM</b><br>(miR-499<br>TG-53) |
|---------------------------------|----------------------------------------------------|------------------------------------------------|--------------------------------------------------|------------------------------------------------|-------------------------------|--------------------------------------------|--------------------------------------------|
| My17 (down in transcriptome)    |                                                    |                                                |                                                  |                                                | not in >50% of samples        |                                            |                                            |
| Pfkfb1 (down in transcriptome)  |                                                    |                                                |                                                  |                                                | detected in 5 hearts only     |                                            |                                            |
| Flvcr2 (down in transcriptome)  |                                                    |                                                |                                                  |                                                | detected in 1 heart only      |                                            |                                            |
| Wif1 (down in transcriptome)    |                                                    |                                                |                                                  |                                                | detected in 3 hearts only     |                                            |                                            |
| Cysltr2 (down in transcriptome) |                                                    |                                                |                                                  |                                                | zero FPKM, all samples        |                                            |                                            |

**Online Table XIV.** Comparison of previously reported *in vivo* miR-499 targets with RISCome regulation in the current study. None of the proposed miR-499 targets from previous studies showed significant upregulation in the RISComes of miR-499 transgenic hearts at 4 weeks of age.

Online Figure I: miR-499 levels in transgenic mice and human heart failure.

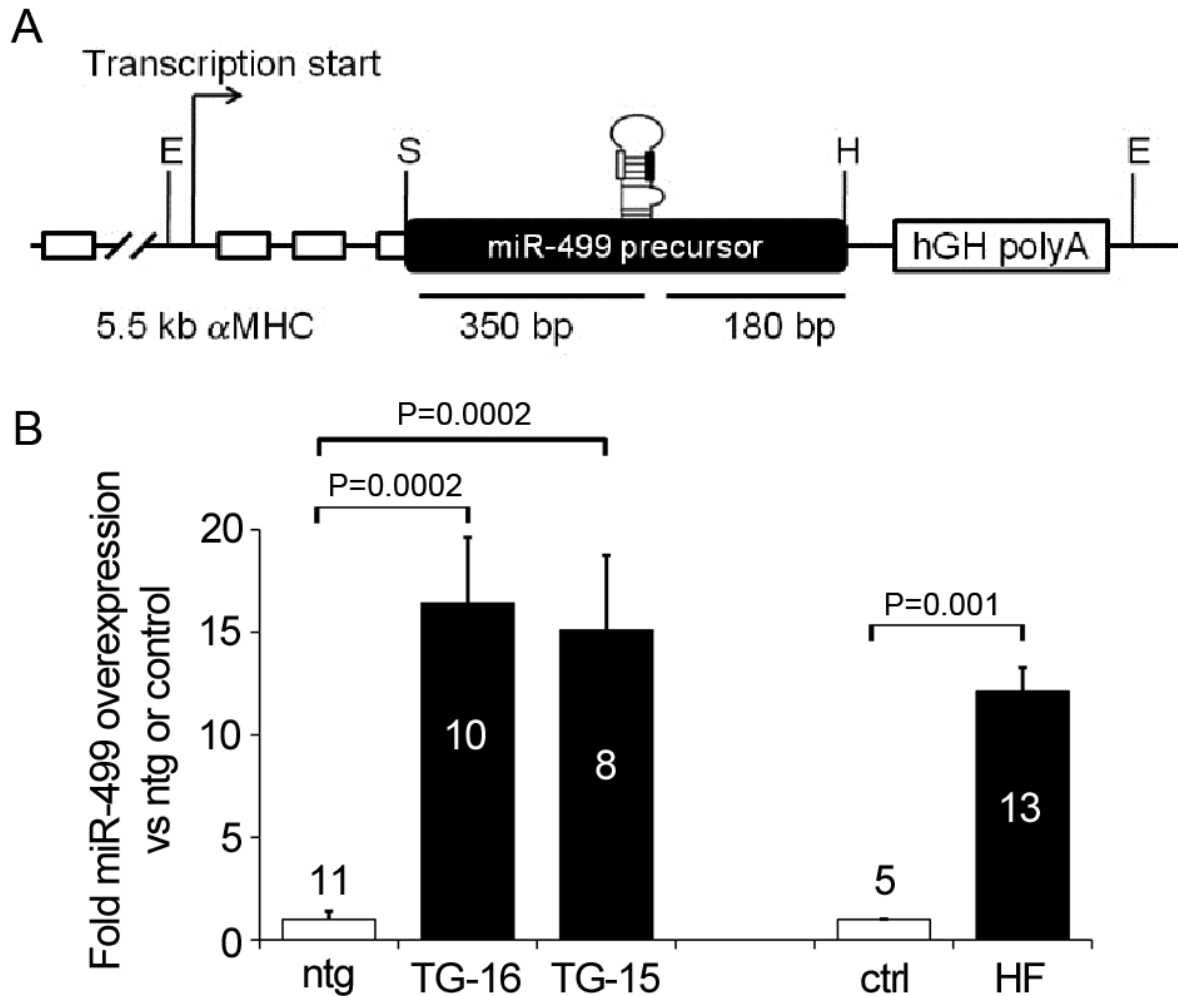

**Online Figure I.** *miR-499* programming of transgenic mouse hearts. **A.** A 530 bp mouse genomic fragment including the miR-499 precursor region was cloned into exon 3 of the murine *Myh6*/ $\alpha$ MHC transgenic expression vector. E = EcoRI, S = SalI, H = HindIII restriction sites. **B.** miR-499 expression relative to 5S rRNA was assayed using the NCode miR RT-qPCR system (Invitrogen). Relative miR-499 levels in two lines of transgenic mouse hearts (numbers in bars show number of individual hearts) compared to failing human hearts are shown.

**Online Figure II: Fibrosis detection in miR-499 transgenic mouse hearts.**

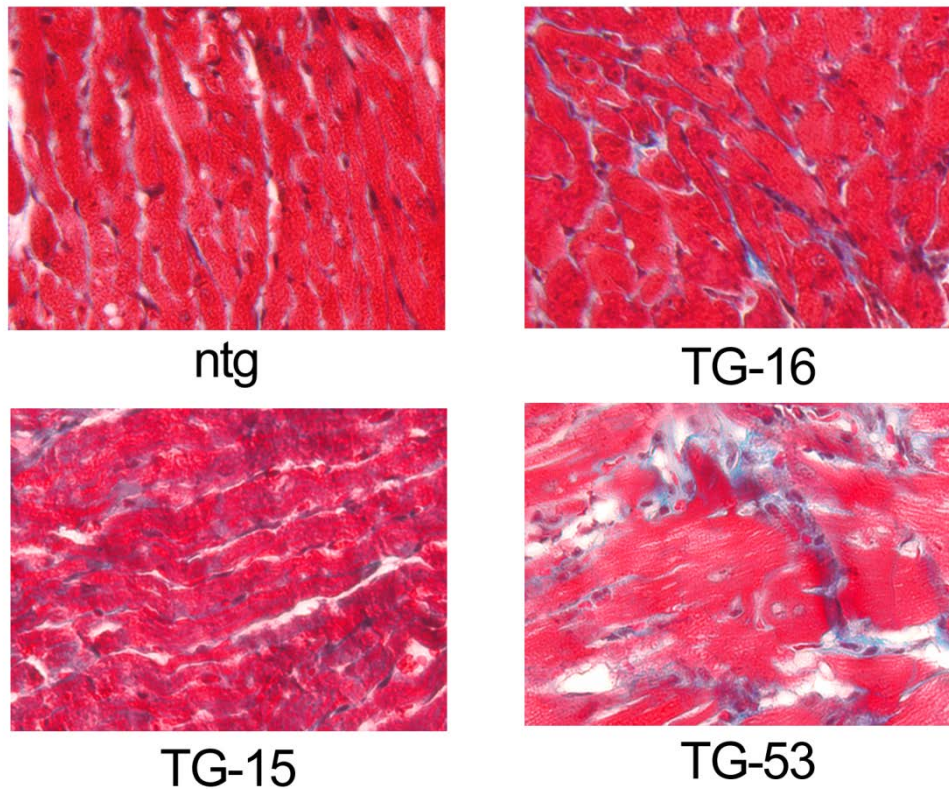

**Online Figure II.** *Fibrosis detection in miR-499 transgenic mouse hearts.* Masson's trichrome was used to stain formalin-fixed, paraffin-embedded sections of nontransgenic and miR-499 transgenic mouse hearts. Transgenic line designations correspond to miR-499 levels shown in **Figure 2a**.

**Online Figure III: Gene Ontology classification of direct and indirect targets of miR-499.**

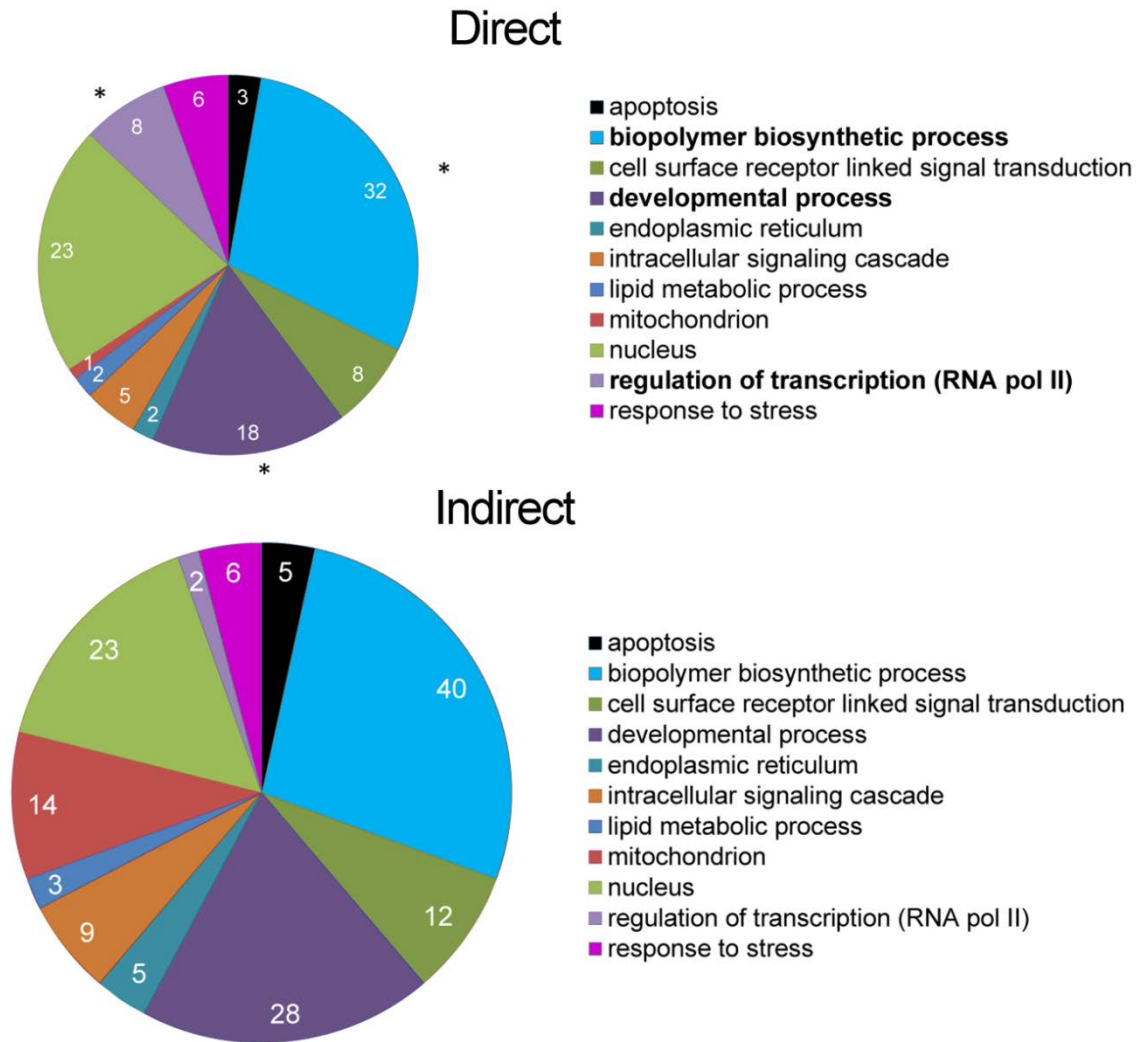

**Online Figure III.** Gene Ontology classification of direct and indirect targets of miR-499. Gene Ontology classification of 67 miR-499 direct mRNA targets (upper) and 136 indirect mRNA targets, regulated both at 4 weeks and 8 weeks of age (lower). Asterisks and bold type indicates over-represented categories<sup>9</sup>.

**Online Figure IV. Unsupervised clustering of miR-499 and TAC-regulated mRNAs.**

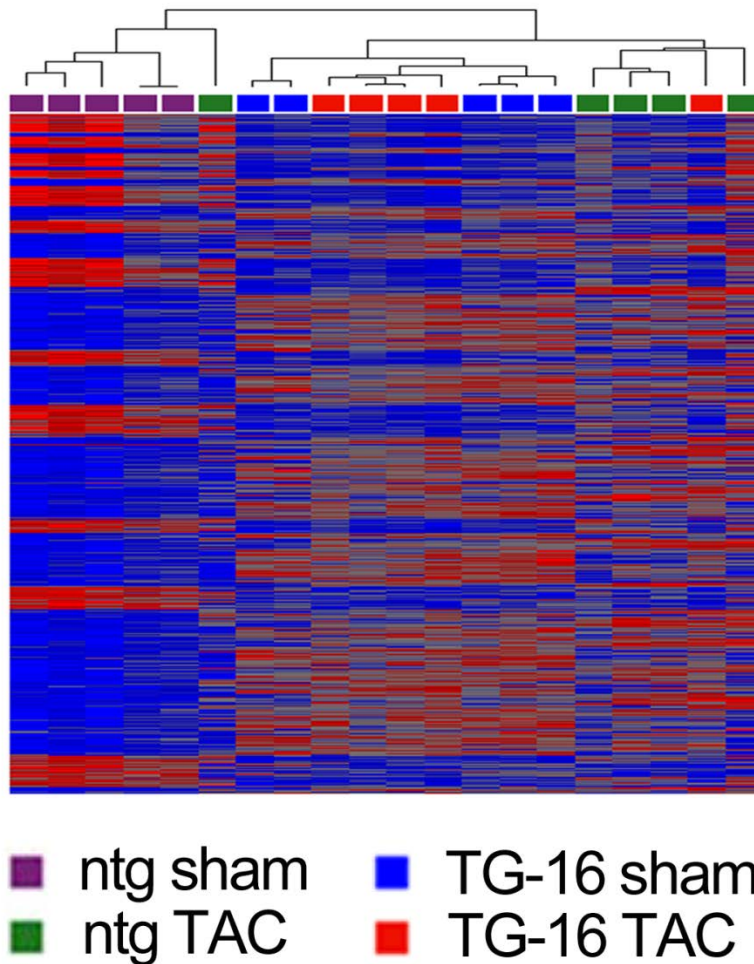

**Online Figure IV.** *Unsupervised clustering of miR-499 and TAC-regulated mRNAs.* Unsupervised hierarchical clustering of 1,168 miR-499-regulated and TAC-regulated mRNAs was performed with Euclidean distance and average linkage (Partek Genomics Suite). Red indicates higher expression, blue indicates lower expression.

Online Figure V: Mapping of proteins in nontransgenic and miR-499 transgenic hearts on 2D DiGE, Panel A

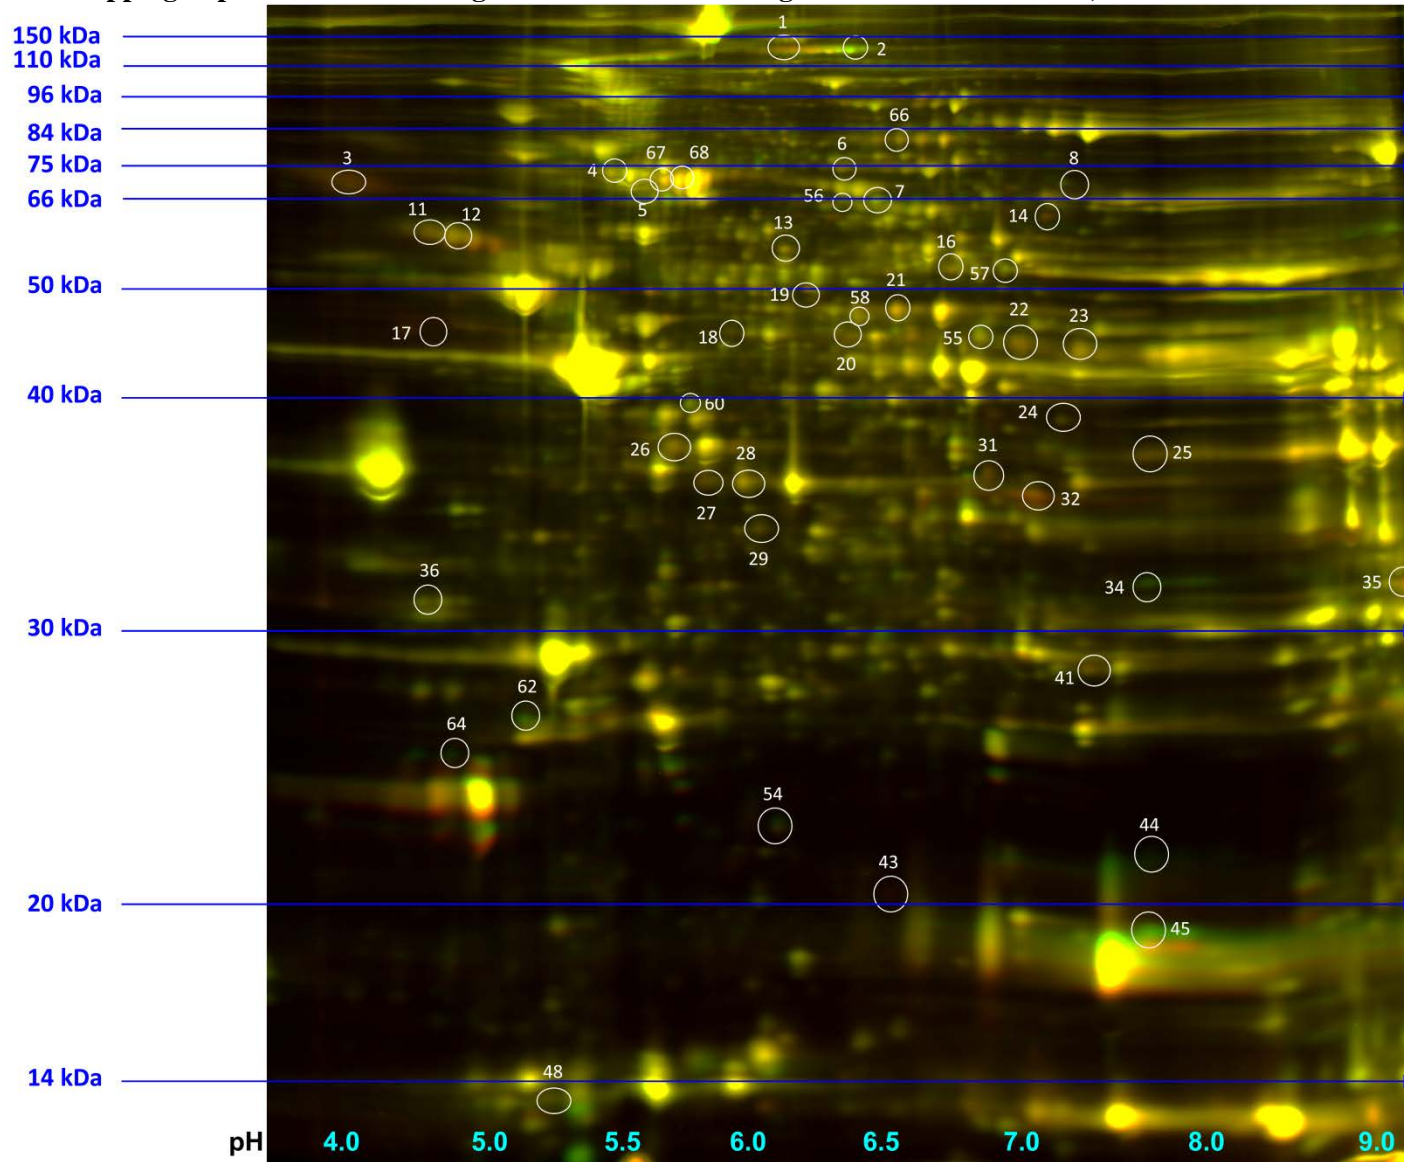



Online Figure V, Panel B

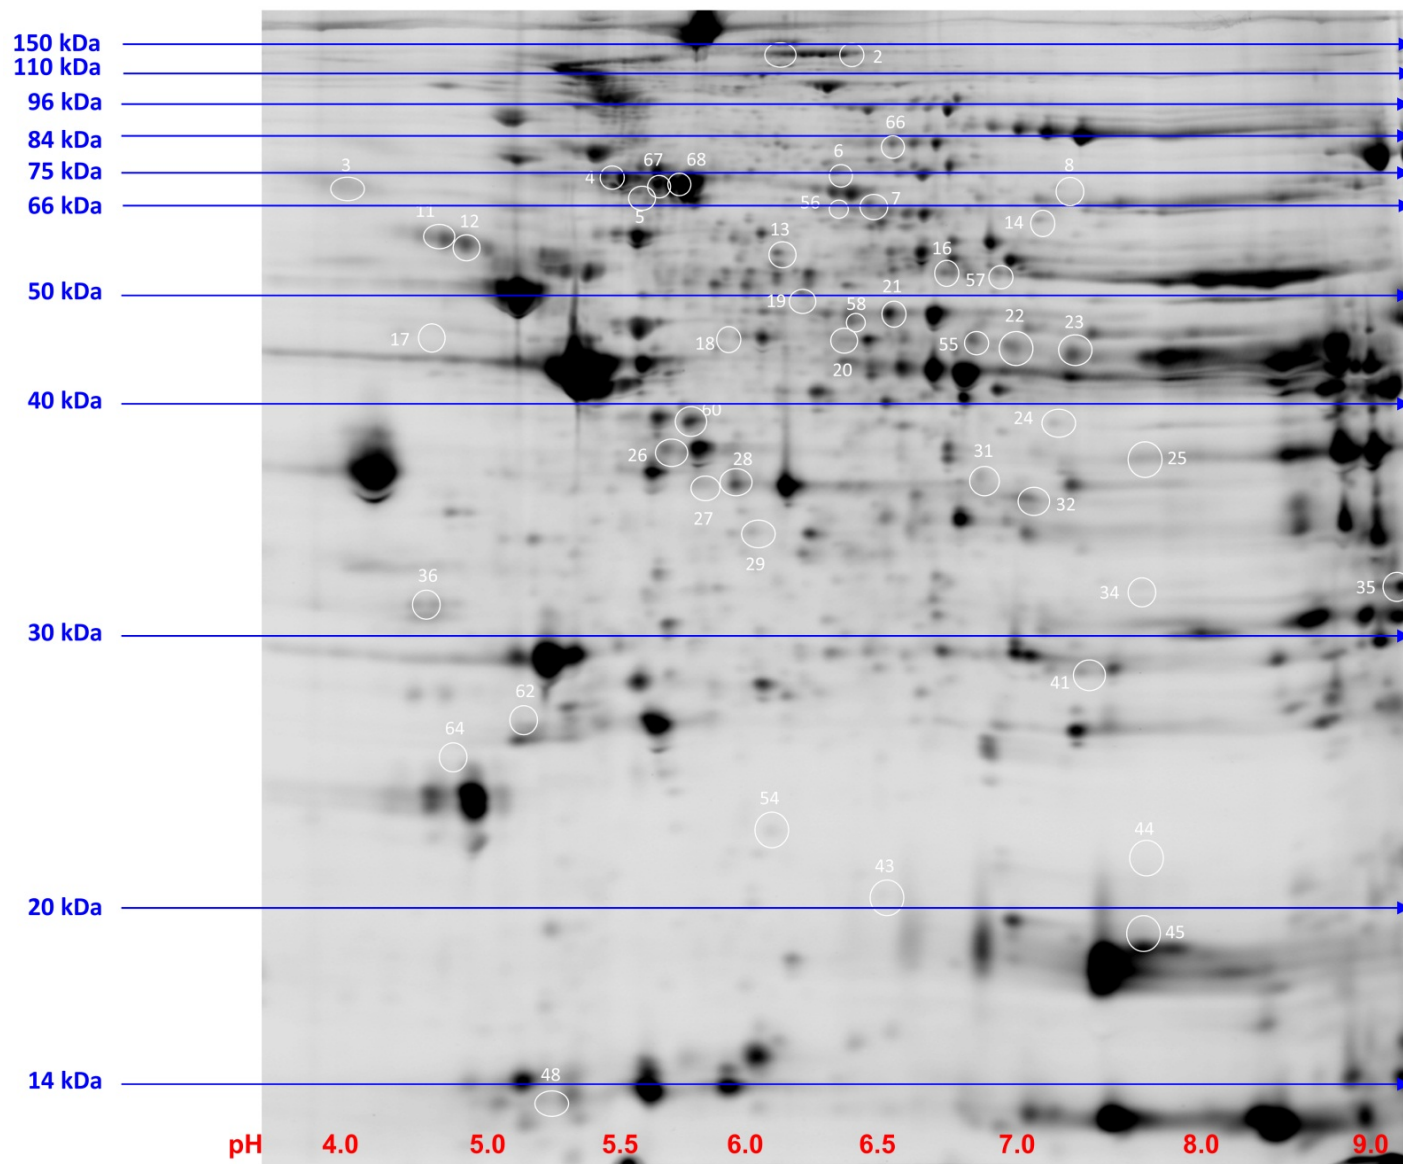

Online Figure V, Panel C

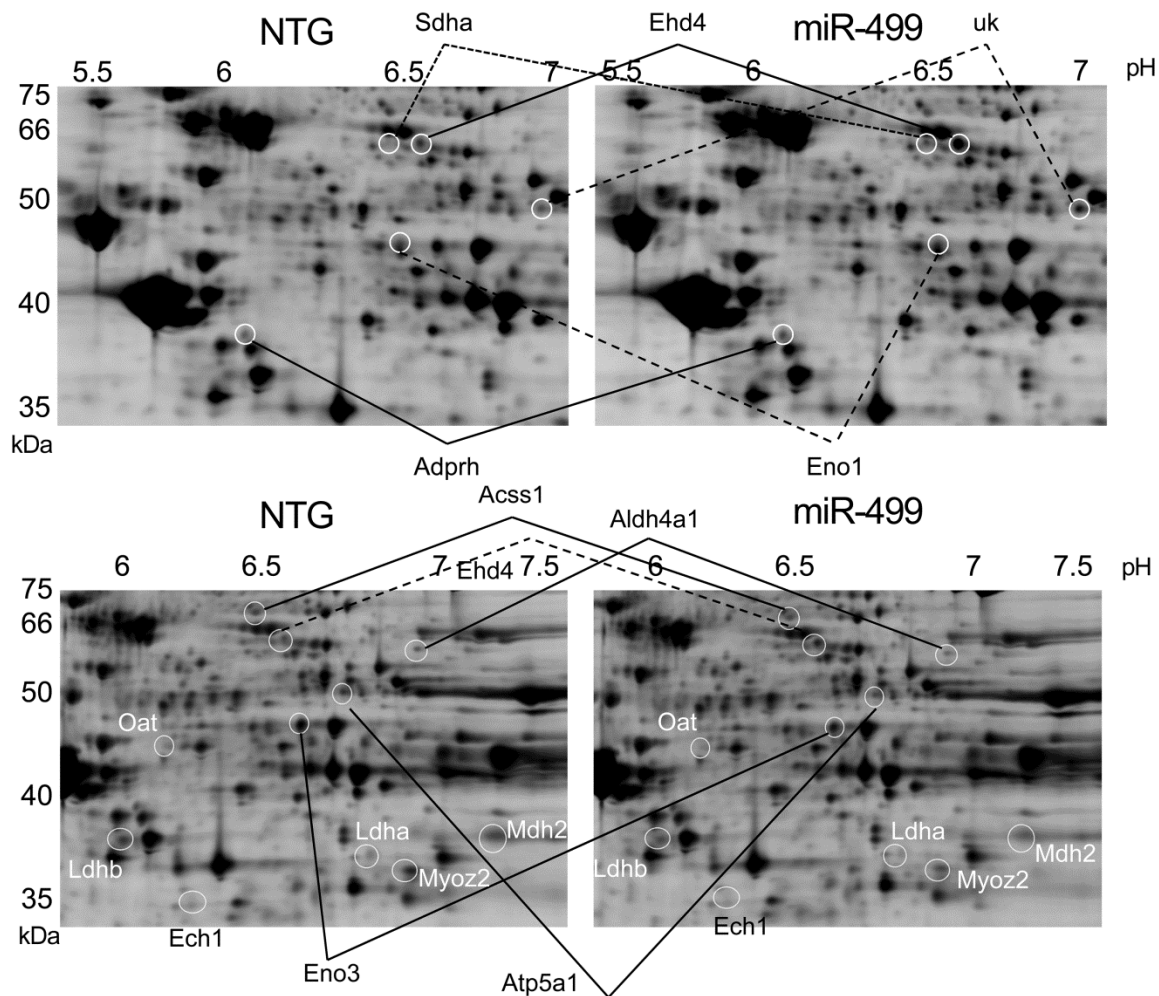

**Online Figure V: Mapping of proteins in nontransgenic and miR-499 transgenic hearts on 2D DiGE.** The 46 protein spots identified by mass spectrometry (n=31) or mapping to previous proteome maps (n=15), whose regulation in 5 separate pairwise comparisons between nontransgenic and miR-499 transgenic hearts is shown in **Online Table X**, are shown on a representative 2D gel. Numbers correspond to protein identifications in **Online Table X**. **Panel A:** nontransgenic protein is shown in red, while miR-499 transgenic protein is shown in green. **Panel B:** only nontransgenic proteins, from the same gel as in the upper panel, are shown. **Panel C:** Magnified views of representative 2D DiGE gel sections, showing spot comparison for a number of proteins whose expression was compared between nontransgenic and transgenic hearts.

**Online Figure VI: Phosphoprotein and total protein analysis by 2D DiGE.**

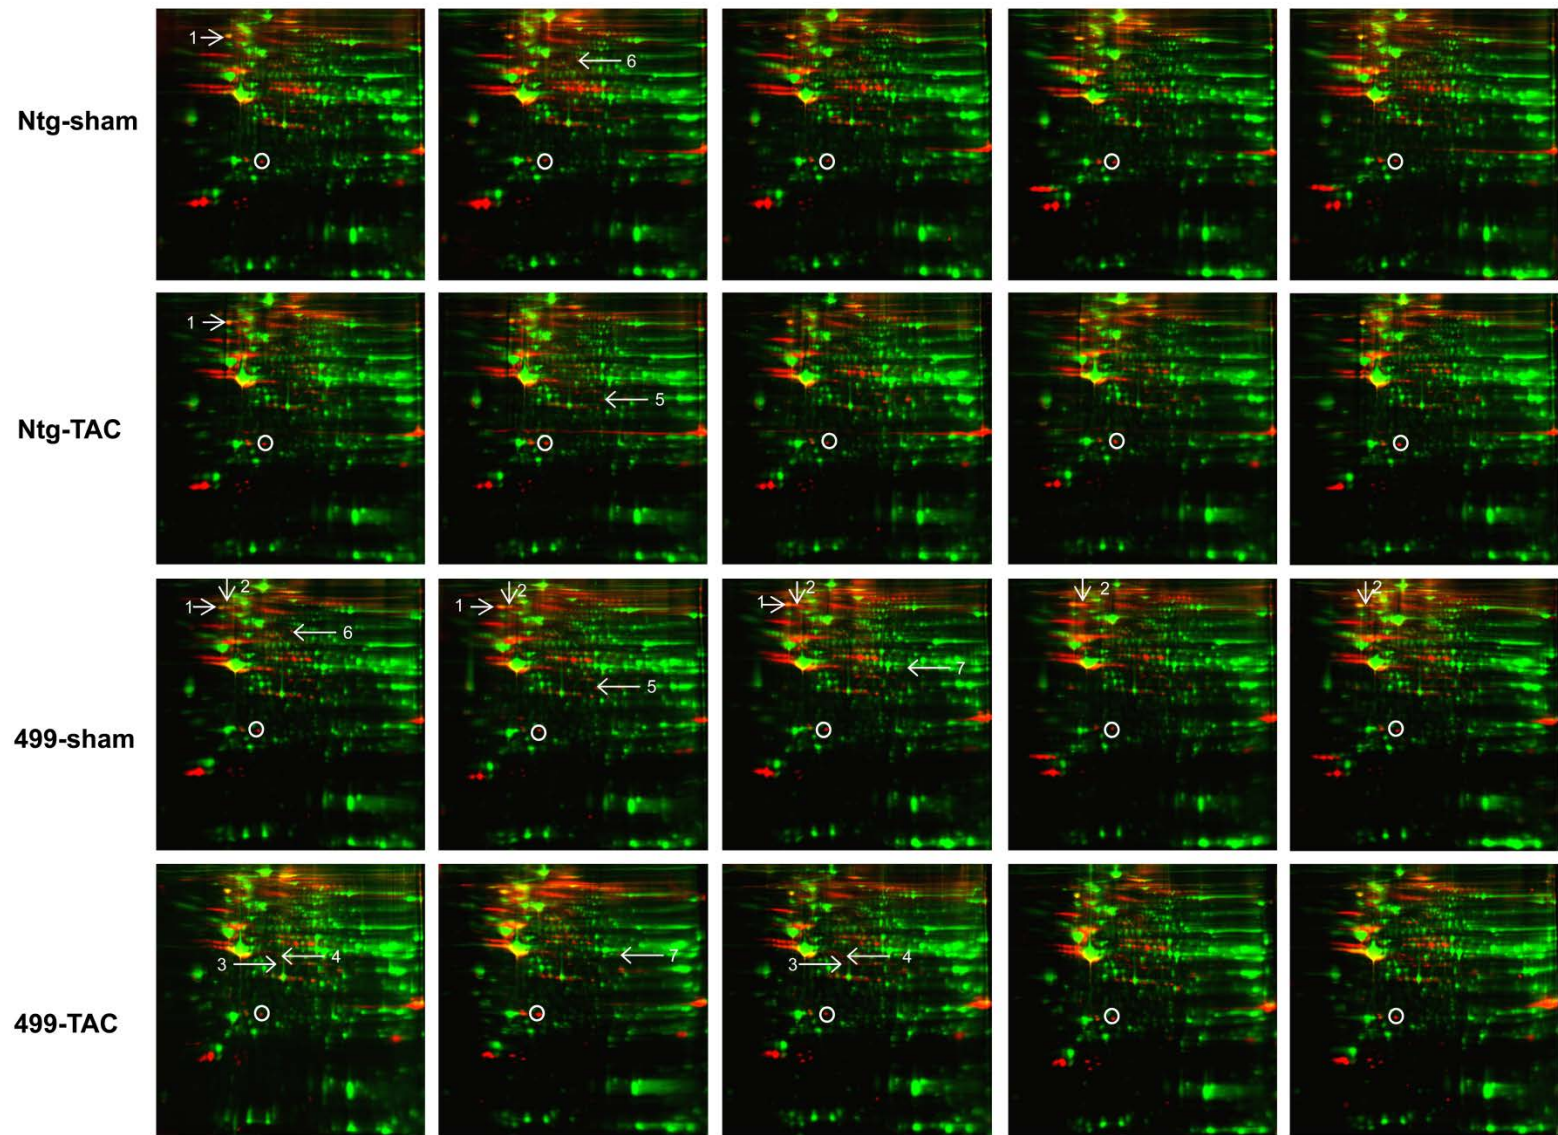

**Online Figure VI: Phosphoprotein and total protein analysis by 2D DiGE.** Five hearts from each treatment group (nontransgenic sham, nontransgenic pressure overload, miR-499 transgenic sham and miR-499 transgenic pressure overload) were analyzed using Cy5 dye staining (green) and ProQ-Diamond phosphoprotein staining (red) on the same gel. All 20 gels are shown. Spots labeled '1' and '2' correspond to phospho-HSP90 $\beta$  spots; '3', phospho-PP1 $\alpha$ ; '4', phospho-Ndufa10; '5', phospho-Gpd1; '6', phospho-Pgm2; '7', phospho-Ehd2, quantitated in **Online Table XII**. Circled spot: internal phosphoprotein standard.

## References

1. Matkovich SJ, Van Booven DJ, Youker KA, Torre-Amione G, Diwan A, Eschenbacher WH, Dorn LE, Watson MA, Margulies KB, Dorn GW, 2nd. Reciprocal regulation of myocardial microRNAs and messenger RNA in human cardiomyopathy and reversal of the microRNA signature by biomechanical support. *Circulation*. 2009;119:1263-1271.
2. Matkovich SJ, Wang W, Tu Y, Eschenbacher WH, Dorn LE, Condorelli G, Diwan A, Nerbonne JM, Dorn GW, 2nd. MicroRNA-133a protects against myocardial fibrosis and modulates electrical repolarization without affecting hypertrophy in pressure-overloaded adult hearts. *Circ Res*. 2010;106:166-175.
3. Matkovich SJ, Zhang Y, Van Booven D, Dorn GW, 2nd. Deep mRNA sequencing for in vivo functional analysis of cardiac transcriptional regulators. Application to *Gαq*. *Circ Res*. 2010;106:1459-1467.
4. Matkovich SJ, Van Booven DJ, Eschenbacher WH, Dorn GW, 2nd. RISC RNA sequencing for context-specific identification of in vivo microRNA targets. *Circ Res*. 2011;108:18-26.
5. Karginov FV, Conaco C, Xuan Z, Schmidt BH, Parker JS, Mandel G, Hannon GJ. A biochemical approach to identifying microRNA targets. *Proc Natl Acad Sci USA*. 2007;104:19291-19296.
6. Trapnell C, Pachter L, Salzberg SL. TopHat: discovering splice junctions with RNA-Seq. *Bioinformatics*. 2009;25:1105-1111.
7. Trapnell C, Williams BA, Pertea G, Mortazavi A, Kwan G, van Baren MJ, Salzberg SL, Wold BJ, Pachter L. Transcript assembly and abundance estimation from RNA-Seq reveals unannotated transcripts and isoform switching during cell differentiation. *Nat Biotechnol*. 2010;28:511-515.
8. Mortazavi A, Williams BA, McCue K, Schaeffer L, Wold B. Mapping and quantifying mammalian transcriptomes by RNA-Seq. *Nat Methods*. 2008;5:621-628.
9. Maere S, Heymans K, Kuiper M. BiNGO: a Cytoscape plugin to assess overrepresentation of gene ontology categories in biological networks. *Bioinformatics*. 2005;21:3448-3449.
10. Varani G, McClain WH. The G x U wobble base pair. A fundamental building block of RNA structure crucial to RNA function in diverse biological systems. *EMBO Rep*. 2000;1:18-23.
11. GeneGo. MetaCore. Available at: <http://www.genego.com>. Accessed 4/2/12.
12. Wang JX, Jiao JQ, Li Q, Long B, Wang K, Liu JP, Li YR, Li PF. miR-499 regulates mitochondrial dynamics by targeting calcineurin and dynamin-related protein-1. *Nat Med*. 2011;17:71-78.
13. Shieh JT, Huang Y, Gilmore J, Srivastava D. Elevated miR-499 levels blunt the cardiac stress response. *PLoS One*. 2011;6:e19481.

## Appendix on RNA-sequencing

### RNA-sequencing bench and analytic procedures, Matkovich+Dorn laboratories, February 2012

|                                                                                                                                                                                     |           |
|-------------------------------------------------------------------------------------------------------------------------------------------------------------------------------------|-----------|
| <b>SAMPLE PREPARATION FOR STANDARD RNA-SEQUENCING.....</b>                                                                                                                          | <b>47</b> |
| Initial RNA extraction .....                                                                                                                                                        | 47        |
| polyA+ RNA enrichment .....                                                                                                                                                         | 47        |
| RNA fragmentation .....                                                                                                                                                             | 48        |
| cDNA synthesis.....                                                                                                                                                                 | 48        |
| Sequencing library preparation.....                                                                                                                                                 | 49        |
| <b>ANALYSIS OF RNASEQ DATA, AND DIFFERENTIAL GENE EXPRESSION .....</b>                                                                                                              | <b>53</b> |
| Package differences for differential gene expression and statistics.....                                                                                                            | 53        |
| Links to open-source software packages (Linux installation).....                                                                                                                    | 54        |
| <b>Analysis procedure (tophat / cufflinks) .....</b>                                                                                                                                | <b>55</b> |
| Sample bash script for RNASeq / RISCSeq analysis, giving FPKM based on all reads mapped to the <u>genome</u> and FPKM based on a 'masked' gtf (e.g. that does not include rRNAs)... | 57        |
| Sample bash scripts for RNASeq / RISCSeq analysis, giving FPKM based on all reads mapped to the <u>transcriptome</u> .....                                                          | 59        |
| <b>Analysis procedure (HTSeq / DESeq / edgeR) .....</b>                                                                                                                             | <b>63</b> |
| <b>Supplemental commands: sequence sorting by index, removal of indexes, and fastq generation.....</b>                                                                              | <b>65</b> |

## Sample preparation for standard RNA-sequencing

Dorn lab, November 2009 – October 2011 (SJM)

Bench procedures are based on the following published method:

Mortazavi A, Williams BA, McCue K, Schaeffer L, Wold B. Mapping and quantifying mammalian transcriptomes by RNA-Seq. Nat Methods. 2008;5:621-628.

### Initial RNA extraction

Use Trizol (Invitrogen), following the manufacturer's directions precisely. If homogenizing tissue, keep tissue frozen (in liquid nitrogen), wash down homogenization probe with a few hundred  $\mu$ L of Trizol first, add e.g. 0.5 mL Trizol directly to tube, and homogenize. For mouse heart apices, I use a total of 1 mL Trizol; the second aliquot of 0.5 mL is used to help wash tissue pieces out of the probe. This results in good extraction of the total RNA fraction. To enhance recovery of the small RNA fraction (not needed for mRNA-Seq, but useful to have for e.g. miR quantitation), increase the length of the isopropanol precipitation step at room temperature from the recommended 10 minutes to 30 minutes (advice from Invitrogen, and LC Sciences, Houston, TX).

After air-drying RNA pellet, resuspend in 30-50  $\mu$ L DEPC-treated H<sub>2</sub>O and heat at 65 C for 5 min (as recommended by Trizol protocol).

Until completion of cDNA synthesis from RNA, use appropriate RNase-free technique at all stages!

Quantitate RNA using a standard spectrophotometer or NanoDrop.

**Integrity MUST be analyzed too** – e.g. 1% TBE agarose gel, using RNA dissolved in a formaldehyde- or formamide-containing solution. As an example of how to do this on native agarose (without having to deal with formaldehyde-agarose), see Novagen's RNA analysis technical bulletin TB108, p. 2-3 (this info is drawn from Maniatis et al molecular cloning manuals). Agilent BioAnalyzer chips are another option.

### polyA+ RNA enrichment

1. Take e.g. 5-10  $\mu$ g total RNA, and perform 2 rounds of binding to oligo(dT)-resin.
2. I have had good success with the Dynabeads mRNA purification kit (Invitrogen #610-06), which requires the use of a Dynal magnet to permit washing of oligo(dT) beads. Use 100  $\mu$ L of beads per 5  $\mu$ g total RNA sample. This quantity of Dynabeads has a binding capacity of 1  $\mu$ g of (polyA+)RNA.
3. Follow the protocol given with the kit to perform the first round of isolation. Keep the supernatant (after initial binding of RNA to beads), and after washing, elute polyA+ RNA in 15  $\mu$ L 10 mM Tris, pH 8.2.

4. Re-prepare Dynabeads for binding by washing once in 1x 'binding buffer'; it will be necessary to prepare a dilution of the 2x buffer supplied with the kit.
5. Incubate the supernatant preserved from the initial binding step at 65 C, 2' and then chill on ice. Perform an additional round of RNA binding to beads.
6. Wash beads and elute further polyA+ RNA in another 15 uL 10 mM Tris, and add to the RNA eluted in the first isolation.
7. Quantitate polyA+ RNA using NanoDrop.

From time to time Invitrogen has had availability problems with the Dynabeads mRNA system. An alternative which has worked well for me is the 'Magnetic mRNA isolation kit' from New England Biolabs, #S1550S; the magnetic beads are compatible with the Invitrogen Dynal magnet, and the principle is much the same.

### RNA fragmentation

This step 'shatters' full-length RNA transcripts into 200-500 nt fragments, permitting uniform reverse transcription during subsequent stages. The Mortazavi et al. paper documents full-length RNA+oligo(dT) reverse transcription vs fragment RNA+random primer reverse transcription, and concludes that fragmentation with random primer RT improves coverage.

1. Take 100-500 ng polyA+ RNA, and prepare a solution of 20 uL in 'fragmentation buffer' (40 mM Tris acetate, 100 mM K acetate, 30 mM Mg acetate, DEPC H<sub>2</sub>O, pH 8.2). Recipe for 5x fragmentation buffer, 50 mL: 1.21 g Tris base, 2.45 g K acetate, 1.61 g Mg acetate tetrahydrate. Adjust pH with 1 N acetic acid, and keep aliquots frozen at -20 C.
2. Heat at 94 C, 2 min 30 s, then chill on ice.
3. Purify the fragmented RNA from the acetate buffer using e.g. Zymo RNA Clean+Concentrate columns, eluting in 8-9 uL for maximum input into Invitrogen SuperScript III 1<sup>st</sup>-strand cDNA reaction.

### cDNA synthesis

1<sup>st</sup>-strand: Invitrogen SuperScript III 1<sup>st</sup>-strand synthesis system, #18080-051 (50 reactions). Each reaction can accommodate 8 uL of fragmented polyA+ RNA. Follow the directions supplied, but do not treat with supplied RNase H at the end of this procedure.

1. Combine 8 uL RNA, 1 uL 50 ng/uL **random hexamers**, 1 uL 10 mM dNTP mix.
2. Incubate at 65 C for 5 min, then place on ice for 1 min.
3. Add 10 uL 'cDNA synthesis mix', prepared as follows:
 

|                               |      |
|-------------------------------|------|
| 10x supplied RT buffer        | 2 uL |
| 25 mM MgCl <sub>2</sub>       | 4 uL |
| 0.1 M DTT                     | 2 uL |
| RNaseOUT (40 U/uL)            | 1 uL |
| SuperScript III RT (200 U/uL) | 1 uL |
4. Incubate 10 min at 25 C, 50 min at 50 C, 5 min at 85 C, and chill on ice.



2<sup>nd</sup>-strand: To the 20 uL 1<sup>st</sup>-strand reaction, add on ice:

|                                            |       |
|--------------------------------------------|-------|
| DEPC-treated H <sub>2</sub> O              | 91 uL |
| 5x 2 <sup>nd</sup> -strand reaction buffer | 30 uL |
| 10 mM dNTP mix                             | 3 uL  |
| E. coli DNA ligase (10 U/uL)               | 1 uL  |
| E. coli DNA polymerase I (10 U/uL)         | 4 uL  |
| E. coli RNase H (2 U/uL)                   | 1 uL  |

(5x 2<sup>nd</sup>-strand reaction buffer has the following composition: 100 mM Tris.HCl pH 6.9, 450 mM KCl, 23 mM MgCl<sub>2</sub>, 0.75 mM β-NAD<sup>+</sup>, 50 mM (NH<sub>4</sub>)<sub>2</sub>SO<sub>4</sub> )

Vortex gently to mix, and incubate for 2 h at 16 C. Do not allow the temperature to rise above 16 C. Place tubes on ice and freeze at -20 C, or move directly to Qiagen column purification.

[An alternative to the above 1<sup>st</sup>- and 2<sup>nd</sup>-strand methods is to use Stratagene's Just cDNA synthesis kit (#200453) for up to 25 uL of fragmented RNA, and their directions with regard to time and temperature of enzymatic incubations, with the following modifications:

- Relax secondary structure at 65 C, 5 min, followed by chilling on ice, prior to adding RNA to the 1<sup>st</sup>-strand synthesis components.
- Use random primers for 1<sup>st</sup>-strand synthesis, not oligo(dT).
- I have not used radioisotopic analysis as suggested by Stratagene's protocol to monitor the efficiency of cDNA synthesis, although I have performed agarose gel electrophoresis using Stratagene's 5 ug polyA+ RNA 'test' sample supplied with the kit.
- The kit is somewhat expensive (\$60/sample) and the above recipe with 'home-made' buffer and enzymes represents a much lower cost per sample (~\$30). ]

After completion of 2<sup>nd</sup>-strand synthesis, purify cDNA on Qiagen columns, eluting in 34 uL 10 mM Tris pH 8.5, and then use the EndIt end-repair kit from Epicentre Biotechnologies (details in separate protocol for preparation of Illumina sequencing libraries) to blunt cDNA fragments. Proceed with the remainder of library synthesis.

### **Sequencing library preparation**

Continue with preparation of Illumina sequencing libraries as per Dorn lab protocol (October 2011).

For 'standard' mRNA work, it is likely that Illumina indexing adapters will be desired and 8-16 indexed samples will be combined into 1 sequencing lane of ~180 million raw 42-nt reads (indexes are read separately and do not detract from the 42-nt available for sequence alignment). As of Oct 2011 we can gain ~180 million raw 42-nt reads on 1 lane of Illumina HiSeq for \$1300.

The protocol below for sequencing library generation is based on the 'ChIP sequencing protocol' available at <http://bioinfo.mbb.yale.edu/array/resources.html> (Yale Center for Excellence in Genomic Science).

### **STEP 1: End Repair**

Use 'End-It DNA End Repair Kit' from Epicentre Biotechnologies, Cat# ER0720

a) Combine and mix the following components in a microfuge tube

1-34  $\mu$ l DNA to be end-repaired (i.e. however much DNA was isolated)

5  $\mu$ l 10X End-Repair Buffer

5  $\mu$ l 2.5 mM dNTP Mix

5  $\mu$ l 10 mM ATP

x  $\mu$ l sterile water to bring reaction volume to 49  $\mu$ l

1  $\mu$ l End-Repair Enzyme Mix

50  $\mu$ l Total reaction volume

b) Incubate at **room temperature** for 45 minutes.

c) Purify on one QIAquick column using the QIAquick PCR Purification Kit and protocol, eluting in 34  $\mu$ l of EB.

### **STEP 2: Addition of 'A' base to 3' Ends**

Use Klenow (3'→5' exo-) from NEB Cat# M0212S

\*\*Before starting, make up stocks of 1 mM dATP using NEB 100 mM dATP,

e.g. add 5  $\mu$ l of 100 mM dATP to 495  $\mu$ l Qiagen Buffer EB (10 mM Tris, pH 8.5); then make 50  $\mu$ l aliquots and freeze at -20C. Defrost aliquots only once.

a) Combine and mix the following components:

DNA from Step 1 34  $\mu$ l

Klenow buffer = NEB Buffer 2 5  $\mu$ l

1 mM dATP (will have to make this up) 10  $\mu$ l

Klenow fragment (3' to 5' exo minus) 1  $\mu$ l

50  $\mu$ l Total reaction volume

b) Incubate for 30 min at 37 °C.

c) Purify on one QIAquick MinElute column using the MinElute PCR Purification Kit and protocol. Elute in 10  $\mu$ l EB.

### **STEP 3: Adapter ligation**

Use LigaFast from Promega Cat#M8221. Adapter mix is a pre-annealed blend of Illumina-Index-AdapterA and 5'-phosphorylated Illumina-Index-AdapterB (sequences can be requested from Illumina).

Annealed adapter mix is typically at 50  $\mu$ M (50 starting DNA = x g / (660 g mol<sup>-1</sup> bp<sup>-1</sup> \* y bp), where bp = typical length of fragments (200-300 bp). For e.g. 1 pmol starting ds cDNA, plan to add 10 pmol annealed adapter mix (10-fold molar excess).

a) Combine and mix the following components in a microfuge tube

DNA from Step 2 10  $\mu$ l

DNA ligase buffer 15  $\mu$ l

RNase, DNase-free water 2  $\mu$ l

Adapter oligo mix >see note above 1  $\mu$ l

DNA ligase 2  $\mu$ l

30  $\mu$ l Total reaction volume

b) Incubate for 15 min at room temperature.

c) Purify on one Qiaquick MinElute column using the MinElute PCR Purification Kit and protocol. Elute in 10  $\mu$ l EB.

d) Gel-purify the DNA (using a 2% low-melting agarose gel, such as that formed using Amresco Agarose II) by cutting a gel slice that does NOT include any DNA from an adapter-adapter band migrating at  $\sim$ 120 bp. The intended ligation product may not be readily visible at this stage if the DNA input was small (0.5  $\mu$ g or less). Isolate DNA in the 150-300 bp range. If making multiple libraries be very careful to avoid cross-contamination by leaving at least two empty lanes between each sample.

e) Purify the DNA from the agarose slice using a QIAGEN Gel Extraction Kit. Perform the steps listed as 'optional' in the Qiagen booklet by adding 1 gel volume of isopropanol to the melted agarose, and an additional wash in 0.5 mL buffer QG. Elute in 30  $\mu$ l EB.

***STEP 4: PCR for recovery of gel-purified material and addition of index.***

Phusion DNA polymerase, NEB Cat# F-531

Illumina Index PCR 1.0

Illumina Index PCR 2.0

Illumina Index reverse primers (a different one for each library)

As for the adapter mix in step 3, sequences can be requested from Illumina.

a) Combine and mix the following components in for PCR:

DNA from Step 3 10  $\mu$ l (which means that some is still available should there be an error or further optimization required at this stage)

Phusion DNA polymerase 2x master mix 25  $\mu$ l

PCR primer 1.0, 25  $\mu$ M > 1  $\mu$ l

PCR primer 2.0, 0.5  $\mu$ M > 1  $\mu$ l

PCR index reverse primer, 25  $\mu$ M > 1  $\mu$ l

50  $\mu$ l Total reaction volume

b) Amplify using the following PCR protocol:

30 sec at 98  $^{\circ}$ C

[10 sec at 98  $^{\circ}$ C, 30 sec at 65  $^{\circ}$ C, 30 sec at 72  $^{\circ}$ C], 12 cycles total. (Use 12 cycles for 0.5  $\mu$ g initial cDNA input – increase cycle number for lower inputs).

5 min at 72  $^{\circ}$ C

Hold at 4  $^{\circ}$ C

Purify final product on Qiaquick PCR purification column and elute in 30 uL buffer EB. Run 3-5 uL on a 2% agarose gel (no need for low-melting agarose) to verify fragment sizes. Run the gel far enough, and against appropriate DNA marker ladder, to ensure there are no 100-120 bp adapter 'dimer' bands contaminating these final libraries.

***STEP 5: Quantitate DNA and prepare for submission.***

Quantitate final amplified, column-purified DNA using a PicoGreen assay. Dorn lab experiences during early 2009 were that PicoGreen was more accurate than NanoDrop for this step, and this was critical for appropriate formation of DNA clusters on Illumina flowcells.

Approximate fragment size will have been observed by running out some of the final product on a gel. Dilute some of the final library (or blend of indexed libraries) to 8 pM and submit to Illumina HiSeq.

### **Analysis of RNASeq data, and differential gene expression**

Up to October 2011, the open source packages 'tophat' and 'cufflinks' have been implemented on Unix/Linux platforms to convert raw sequence reads into gene expression data (RPKM; and with later versions of cufflinks, FPKM – fragments per kilobase of exon per million sequencing reads, which is equivalent to RPKM for single-end sequencing). The number of reads/fragments mapping to each gene is thus normalized to the length of the gene, and to the total number of mapped reads. This permits comparison of expression levels between genes, and between different sequencing libraries.

→ We are now using Illumina indexing (library-specific tags on the 3' end of the read, rather than 5' barcodes). At some point, reads will be demultiplexed at the sequencing facility and converted to fastq format, eliminating the need to remove barcodes and convert Illumina's SCARF format to fastq. It will be necessary to pay attention to the quality score format (phred score) used in the new Illumina files in order to select the correct option for tophat software.

→ Partek Genomics Suite has matured to the point where it can accept .bam format files produced by 'tophat', and convert them to RPKM scores with annotated names for each gene. However, the calculations used for conversion to gene expression are less well documented than for Cufflinks.

### **Package differences for differential gene expression and statistics**

Conversion of aligned reads to gene expression values, with or without provision for determining isoform fractions and/or new alternatively-spliced transcripts, has been the subject of much discussion. The most appropriate determination of significant differences in gene expression between treatments is also a part of the debate, with three principal groups involved (Simon Anders, Germany; Cole Trapnell & Lior Pachter, Maryland; Gordon Smyth, Australia). All have released packages to calculate expression values and associated statistics (HTSeq+DESeq, Anders; Cufflinks and Cuffdiff, Trapnell/Pachter; edgeR, Smyth).

HTSeq+DESeq, and edgeR, use the actual number of reads aligned to a given mRNA, normalized to total reads, in their gene expression and statistical calculations. They can use either local (per-gene) or global (per gene-set) dispersion (~ variance) to determine statistical significance, and rely on a negative binomial distribution. Cufflinks and Cuffdiff use FPKMs, can investigate isoform differences, but don't estimate variance in the same way.

We've typically used a more straightforward method of importing Cufflinks FPKM values into statistical software such as Partek, and calculating p-values and associated false discovery rates. This is apparently not the same as the DESeq / edgeR process, and may be giving some false positives at lower gene expression values and some false negatives at higher gene expression values in comparison to the approach used by DESeq / edgeR. However, this is still the subject of active debate.

## Links to open-source software packages (Linux installation)

### Tophat/Cufflinks

<http://bowtie-bio.sourceforge.net/index.shtml>

<http://tophat.cbcb.umd.edu/>

<http://cufflinks.cbcb.umd.edu/>

<http://samtools.sourceforge.net/>

### HTSeq / DESeq / edgeR

<http://www-huber.embl.de/users/anders/HTSeq/doc/overview.html>

<http://www-huber.embl.de/users/anders/DESeq/>

<http://www.bioconductor.org/packages/release/bioc/html/edgeR.html>

And for general discussion of package use, advantages / disadvantages / contrasts between methods, investigate the Bioinformatics and RNA-seq forums at:

<http://seqanswers.com/forums/index.php>

## Analysis procedure (tophat / cufflinks)

1. Obtain Illumina sequence read files, and split them into files pertaining to each barcode or index used to differentiate individual samples on the sequencing lane. (See Appendix at the end of this document on how to perform this operation.) Make sure the final files are in fastq format.
2. Determine the phred scale for the Illumina basecalling quality scores. Files generated with Illumina pipeline 1.3 and above (generally from 2009 onward) will require the use of an additional parameter in tophat. Files from October 2011 onward from Wash U GTAC may require the *omission* of this parameter (`--solexa1.3-quals`) due to a change to the phred scale.
3. Prepare a Bowtie index for your genome of interest. (Illumina have made several prebuilt indices available for human, mouse, rat and *Drosophila*. See link to iGenomes at <http://cufflinks.cbcb.umd.edu/igenomes.html>.)
4. Obtain a .gtf annotation file to describe the transcriptome present within your genome of interest (included within iGenomes). You may also want to prepare a 'masked' gtf, in which RNAs you don't want to consider in your analysis will have been removed, e.g. rRNAs, hnRNAs, snoRNAs. To do this, make a list of these genes (as a text file, with each gene symbol on a new line). Issue the following command at a shell prompt, within your gtf directory:

```
grep -f maskedgenefile -v all_genes.gtf > masked_genes.gtf
```

where **maskedgenefile** is your list of genes to remove and **all\_genes.gtf** is the original gtf.

5. It's most convenient to gather all the fastq files you wish to analyze into the same directory. The names you give them will be used as output folder names that contain several analysis files.
6. Make the appropriate changes to variables in the prebuilt analysis script given in the following pages:

PROJECTDIR (location of your fastq files)

QSCORES (this will be `"--solexa1.3-quals"` or `""`)

BOWTIEINDEX (location of your bowtie index for genome mapping)

REFGTF (a gtf file containing information on all RNAs you would like to map)

MASKEDGTF (a gtf file without information on those RNAs you wish to ignore)

readlength (nt length of your sequencing reads)

threads (number of processing cores)

**\*\* Note, February 2012:** tophat 1.4.0 permits mapping of reads to a defined transcriptome, which obviates the need to produce a 'masked' file in this way. Instead, you could produce a 'full' output file by mapping to the entire genome, and a 'transcriptome' output file by mapping to a defined transcriptome only. Note that different FPKM values will result from these two procedures, since the denominator for FPKM is different (either all reads mapped

to the genome, or all reads mapped to the defined transcriptome). There are two sample scripts at the end of this section; one using mapping to the full genome, and one using mapping to a defined transcriptome. \*\*

7. Determine the total reads per indexed sample, and total aligned reads, using the output files produced from the script below.
8. Import the genes.fpkm\_tracking file for each sample into Microsoft Excel (one sample per workbook tab). To make it possible to combine data from different samples into one file later on, add an additional column with the title 'Sample' and fill it all the way down with the sample ID.
9. Merge all the tables together, either in Excel or using the 'import table' facility in Microsoft Access.
10. Import the merged table into Access.
11. Make a 'crosstab query' with gene\_id (the Ensembl ID) as the row heading, sample as the column heading, and FPKM as a Value (select First.)
12. Make another 'crosstab query' with gene\_id as the row heading, sample as the column heading, and FPKM\_status as a Value (select First.)
13. Make a 'simple query' in which the gene\_id fields from both of the crosstab queries are linked together. In the query, place all of the fields from the first query together with all the fields from the second query. This will produce one table in which you have all gene FPKM values *and* their 'quality status', separated by sample.
14. Import a table into Access, from previous Access files or made in Excel, of all of the desired Ensembl IDs and gene symbols for your output (i.e. either a 'full' gene list or a 'reduced' transcriptome list). Make another simple query, linking this Ensembl ID-gene symbol table to the previous query containing all FPKM and status information.

Further analysis to designate any outlier samples, and to calculate fold-changes, p-values, may be optimally done using Partek Genomics Suite.

First, however, export your final query from step 13 as an Excel sheet. You will likely want to eliminate any mRNA entries with signals below a certain FPKM threshold, or with signals in <50% of samples. Also, match FPKM values to status values, and discard any that are not 'OK'. (Construct an IF statement in Excel to show either the FPKM or the non-OK status values.)

Once the data have been 'proofed', export them as a .csv file, and import into Partek for ANOVA (fold-changes, p-values, FDR) and heatmaps or volcano plots.

Note: heatmaps are best drawn with gene expression data in log<sub>2</sub> scale, so be prepared to transform your FPKM data to log<sub>2</sub>, either in Excel or with Partek.



## Sample bash script for RNASeq / RISCSeq analysis, giving FPKM based on all reads mapped to the genome.

This can be copied and pasted into a Linux-based text editor, modified according to the included comments, and made into an executable script. (Line endings will need to be changed from Windows to Unix format. Also be careful to ensure that double-dashes, hyphens and quotation marks are in Unix format, i.e. "-" )

\* \* \*

```
#!/bin/bash

# File processing script for RNASeq of Illumina sequence files
#>=November 2011 versions of tophat and cufflinks

PROJECTDIR=~/Documents/RNASeq_processing/cardiac_RNASeq/mice
FILES=$PROJECTDIR/*.fq
# If the files to be processed are present in a separate list,
# replace $PROJECTDIR/*.fq with `cat /path/to/filelist`

QSCORES="--solexa1.3-quals "

# If you are using Illumina pipeline >1.3, keep QSCORES as is.
# After October 2011 it may be necessary to change this to
# QSCORES="" as the Illumina pipelines are reverting back to the
# 'old' system

BOWTIEINDEX=~/Documents/Illumina_iGenomes/mmus_Ensembl_NCBIM37/Sequence/BowtieIndex/genome
REFGTF=~/Documents/Illumina_iGenomes/mmus_Ensembl_NCBIM37/Annotation/Genes/genes.gtf
readlength=42
threads=4

NOVELJUNCS=""

# --no-novel-juncs instructs tophat to ignore novel splice
# junctions, and instead to use only the definitions supplied in
# the reference gtf file. Replace with "--no-novel-juncs" (which
# is the default) to search for novel splice junctions. Remove
# the # from the following line to enable this facility, and add #
# prior to the line SPLICEJUNC=""

# SPLICEJUNC="G $REFGTF $NOVELJUNCS "
# Keep the space at the end of "G $REFGTF $NOVELJUNCS "; it's
# important for the loop script below

SPLICEJUNC=""
```

```

echo "This script processes fastq files generated from Illumina
sequencing through tophat and cufflinks for RNASeq."
echo "It will produce cufflinks determinations against a
complete gtf, calculating FPKM using all reads mapped to the
genome."
echo ""
echo "Ensure you have installed bowtie, tophat, samtools and
cufflinks, and added them to your PATH variable."
echo "Ensure you have supplied the correct fastq file list,
project directory, sequence read length (divisible by 2), Bowtie
index, full reference GTF, and masked reference in the first
lines of this script."
echo ""
echo "To change whether tophat searches for novel splice
variants, change parameters in the first lines of this script."
echo ""

# Don't change anything below here unless you know what you are
doing.

if [ "$readlength" -lt '50' ] ; then
seglength=$(expr "$readlength" '/' '2')
else
seglength=$readlength
fi

echo $PATH > $PROJECTDIR/program_versions.txt
touch $PROJECTDIR/fq_linenumbers.txt
echo "Divide number of lines by 4 to calculate raw read number."
>> fq_linenumbers.txt
touch $PROJECTDIR/aligned_read_counts.txt

for f in $FILES ; do
echo "Calculating number of lines for " $f
wc -l $f > lines
cat lines
cat lines >> fq_linenumbers.txt
rm lines
echo ""
tophat --segment-length $seglength --segment-mismatches 0 --no-
novel-indels -p $threads -o "$(echo $f | sed 's/\.fq$//')"
$QSCORES$SPLICEJUNC$BOWTIEINDEX $f
echo ""
cd "$(echo $f | sed 's/\.fq$//')"
echo "Calculating aligned reads for " $(echo $f | sed
's/\.fq$//')

```

```

samtools view -o accepted_hits.sam accepted_hits.bam
awk {'print $1'} accepted_hits.sam | sort | uniq | wc -l >
aligned
cat aligned
cat aligned >> $PROJECTDIR/aligned_read_counts.txt
pwd >> $PROJECTDIR/aligned_read_counts.txt
rm aligned
rm accepted_hits.sam
cd "$(echo $f | sed 's/\.fq$//')"
cufflinks -p $threads -G $REFGTF accepted_hits.bam
cd $PROJECTDIR
done

```

\* \* \*

### **Sample bash scripts for RNASeq / RISCSeq analysis, giving FPKM based on all reads mapped to the transcriptome.**

This can be copied and pasted into a Linux-based text editor, modified according to the included comments, and made into an executable script. (Line endings will need to be changed from Windows to Unix format. Also be careful to ensure that double-dashes, hyphens and quotation marks are in Unix format, i.e. "-" )

First: tophat 1.4.0 (and above) needs to build a Bowtie index corresponding to the transcriptome (script A). This only needs to be run once for each transcriptome of interest. The new Bowtie index (in the transcriptome\_data folder) is then used to process future samples (script B).

#### Script / command A (one continuous line):

```

tophat --segment-length 21 --segment-mismatches 0 --no-novel-
indels -p 4 --solexa1.3-quals -o mouse_heart -T -n 1 -G
~/Illumina_iGenomes/mmus_Ensembl_NCBIM37/Annotation/Current/Genes/genes.gtf --transcriptome-index=transcriptome_data/genes_only
~/Illumina_iGenomes/mmus_Ensembl_NCBIM37/Sequence/BowtieIndex/genome mouse_heart.fq

```

#### Script / command B:

```

#!/bin/bash

# File processing script for RNASeq of Illumina sequence files
#>=January 2012 versions of tophat and cufflinks

```

```

PROJECTDIR=~/Documents/Jan12_RNASeq
FILES=$PROJECTDIR/*.fq
# If the files to be processed are present in a separate list,
replace $PROJECTDIR/*.fq with `cat /path/to/filelist`

BOWTIEINDEX=~/Illumina_iGenomes/mmus_Ensembl_NCBIM37/Sequence/Bow
tieIndex/genome
REFGTF=~/Illumina_iGenomes/
mmus_Ensembl_NCBIM37/Annotation/Genes/genes.gtf
TRANSCRIPTOME="--transcriptome-
index=transcriptome_data/genes_only"

# Put the transcriptome data folder and bowtie index prefix name
here. This only seems to work if the transcriptome data folder
is inside the folder from which tophat is run.

readlength=42
threads=4
mismatch=1

QSCORES="--solexa1.3-quals "

# If you are using Illumina pipeline >1.3, keep QSCORES as is.
After October 2011 it may be necessary to change this to
QSCORES="" as the Illumina pipelines are reverting back to the
'old' system

NOVELJUNCS=""

# --no-novel-juncs instructs tophat to ignore novel splice
junctions, and instead to use only the definitions supplied in
the reference gtf file. Replace with "--no-novel-juncs" (which
is the default) to search for novel splice junctions. Remove
the # from the following line to enable this facility, and add #
prior to the line SPLICEJUNC=""

# SPLICEJUNC="-G $REFGTF $NOVELJUNCS "
# Keep the space at the end of "G $REFGTF $NOVELJUNCS "; it's
important for the loop script below

SPLICEJUNC=""

echo "This script processes fastq files generated from Illumina
sequencing through tophat and cufflinks for RNASeq."
echo ""
echo "Tophat 1.4.0 or above will be used to align reads to a
previously prepared transcriptome definition."

```

```

echo "Cufflinks 1.3.0 or above will calculate FPKM against a
previously prepared transcriptome gtf and associated bowtie
index; FPKM will be calculated against reads mapping to the
transcriptome, not the whole genome."
echo ""
echo "Ensure you have installed bowtie, tophat, samtools and
cufflinks, and added them to your PATH variable."
echo ""
echo "Ensure you have supplied the correct fastq file list,
project directory, sequence read length (divisible by 2), and
transcriptome-index folder in the first lines of this script."
echo ""
echo "To change whether tophat searches for novel splice
variants, change parameters in the first lines of this script."
echo ""

# Don't change anything below here unless you know what you are
doing.

if [ "$readlength" -lt '50' ] ; then
seglength=$(expr "$readlength" '/' '2')
else
seglength=$readlength
fi

echo $PATH > $PROJECTDIR/program_versions.txt
touch $PROJECTDIR/fq_linenumbers.txt
echo "Divide number of lines by 4 to calculate raw read number."
>> fq_linenumbers.txt
touch $PROJECTDIR/aligned_read_counts.txt

for f in $FILES ; do
echo "Calculating number of lines for " $f
wc -l $f > lines
cat lines
cat lines >> fq_linenumbers.txt
rm lines
echo ""
tophat --segment-length $seglength --segment-mismatches 0 --no-
novel-indels -p $threads $QSCORES$SPLICEJUNC -o "$(echo $f | sed
's/\.fq$//')" -T -n $mismatch $TRANSCRIPTOME $BOWTIEINDEX $f
echo ""
cd "$(echo $f | sed 's/\.fq$//')"
echo "Calculating aligned reads for " $(echo $f | sed
's/\.fq$//')
samtools view -o accepted_hits.sam accepted_hits.bam
awk {'print $1'} accepted_hits.sam | sort | uniq | wc -l >

```

```
aligned
cat aligned
cat aligned >> $PROJECTDIR/aligned_read_counts.txt
pwd >> $PROJECTDIR/aligned_read_counts.txt
rm aligned
rm accepted_hits.sam
cufflinks -p $threads -G $REFGTF accepted_hits.bam
cd $PROJECTDIR
done
```

## Analysis procedure (HTSeq / DESeq / edgeR)

1. Obtain Illumina sequence read files, and split them into files pertaining to each barcode or index used to differentiate individual samples on the sequencing lane. (See Appendix at the end of this document on how to perform this operation.) Make sure the final files are in fastq format.
2. Determine the phred scale for the Illumina basecalling quality scores. Files generated with Illumina pipeline 1.3 and above (generally from 2009 onward) will require the use of an additional parameter in tophat. Files from October 2011 onward from Wash U GTAC may require the *omission* of this parameter (`--solexa1.3-quals`) due to a change to the phred scale.
3. Prepare a Bowtie index for your genome of interest. (Illumina have made several prebuilt indices available for human, mouse, rat and *Drosophila*. See link to iGenomes at <http://cufflinks.cbcb.umd.edu/igenomes.html>.)
4. Use tophat to align reads to the genome or transcriptome. HTSeq will count the aligned reads mapping to gene entries in the .gtf annotation file corresponding to the genome or transcriptome used by tophat. (See the example bash script.)
5. The HTSeq counts will need to be merged into a table in which columns denote samples, rows are gene entries, and individual cells are counts. Use the crosstab query instructions for Microsoft Access given in steps 9-11 of the tophat/cufflinks analysis procedure.
6. Further processing to gain differential gene expression data, p-values, and associated information is performed using the R statistical language and the modules supplied with DESeq and edgeR – detailed instructions in are included with these downloads as pdf files.

Install HTSeq and any required Python packages according to the instructions found on its installation website. To generate an example script to count raw reads, perform tophat alignment, and extract counts of aligned reads per gene using HTSeq, replace the bottom section of the previous 'script B' in this document for transcriptome processing (the entire section below the comment field stating 'Don't change anything below here unless you know what you are doing' with the following:

```
if [ "$readlength" -lt '50' ] ; then
seqlength=$(expr "$readlength" '/' '2')
else
seqlength=$readlength
fi

echo $PATH > $PROJECTDIR/program_versions.txt
touch $PROJECTDIR/fq_linenumber_counts.txt
echo "Divide number of lines by 4 to calculate raw read number."
>> fq_linenumber_counts.txt
touch $PROJECTDIR/aligned_read_counts.txt

for f in $FILES ; do
```

```

echo "Calculating number of lines for " $f
wc -l $f > lines
cat lines
cat lines >> fq_linenummer_counts.txt
rm lines
echo ""
tophat --segment-length $seglength --segment-mismatches 0 --no-
novel-indels -p $threads $QSCORES$SPLICEJUNC -o "$(echo $f | sed
's/\.fq$//')" -T -n $mismatch $TRANSCRIPTOME $BOWTIEINDEX $f
echo ""
cd "$(echo $f | sed 's/\.fq$//')"
echo "Calculating aligned reads for " $(echo $f | sed
's/\.fq$//')
samtools view -o accepted_hits.sam accepted_hits.bam
awk {'print $1'} accepted_hits.sam | sort | uniq | wc -l >
aligned
cat aligned
cat aligned >> $PROJECTDIR/aligned_read_counts.txt
pwd >> $PROJECTDIR/aligned_read_counts.txt
rm aligned
python -m HTSeq.scripts.count --stranded=no accepted_hits.sam
$REFGTF > "$(echo $f | sed 's/\.fq$/_HTSeq-count.txt/')"
rm accepted_hits.sam
cd $PROJECTDIR
done

```



## Supplemental commands: sequence sorting by index, removal of indexes, and fastq generation

Use the following script:

```
#!/bin/bash

# File processing script for Illumina sequence files to remove
indexes and write out new fastq files.

SEQFILE=s_3_withinindex_sequence.txt
INDEXES=`cat s_3_indexes.list`

# Replace the SEQFILE variable with the name of the Illumina
SCARF file.  Replace the INDEXES variable with a path to a file
containing the indexes to be sorted, one per line.

echo "This script processes an Illumina sequencing SCARF file,
writing out new files separated by indexes, rendered as fastq
format."
echo ""
echo "You should have already changed the SEQFILE and INDEXES
variables to point to the raw sequence file and to the list of
indexes."
echo ""
echo "The raw sequence file is assumed to be from HiSeq single-
end, 42 nt, with index nucleotides at the 3' end."
echo ""
echo "Make sure the list of indexes contains indexes in UPPER
CASE to match the raw sequence file!"
echo ""

for i in $INDEXES ; do
echo 'Processing index '$(echo $i)
grep $(echo $i)':' $SEQFILE | sed -n s/$(echo $i)':'/'/'/p | awk
-F: '{print "@" $1 "_" $2 "_" $3 "_" $4 "_" $5 "\n" $6 "\n" "+"
"\n" substr($7,1,42) }' > 'index_$(echo $i).fq
done

# Change substr($7,1,42) to substr($7,1,x) for sequence read
lengths of x
```
